# Supplementary material for: Defining the conditional basis of silicon phthalocyanine near-IR ligand exchange
Source: Royal Society of Chemistry journal article supplement (doi:10.1039/c8cp03842b), 2018-01-01
Supplement: c8cp03842b1.pdf [file c8cp03842b1.pdf]

## Supporting Information

### Defining the Conditional Basis of Silicon Phthalocyanine Near-IR Uncaging

Erin D. Anderson<sup>†</sup>, Stacey Sova<sup>‡</sup>, Joseph Ivanic<sup>§</sup>, Lisa Kelly<sup>‡</sup>, Martin J. Schnermann<sup>†\*</sup>

<sup>†</sup> Chemical Biology Laboratory, Center for Cancer Research, National Cancer Institute at Frederick, Frederick, USA

<sup>‡</sup> Department of Chemistry and Biochemistry, University of Maryland, Baltimore County, 1000 Hilltop Circle, Baltimore, Maryland 21250, United States

<sup>§</sup> Advanced Biomedical Computational Science Group, Frederick National Laboratory for Cancer Research operated by Leidos Biomedical Research, Inc., Frederick, Maryland 21702, United States

\* email: [martin.schnermann@nih.gov](mailto:martin.schnermann@nih.gov)

#### Content:

1. Comparative actinometry of SiPc **1** in argon-saturated PBS vs. benzophenone standard in acetonitrile.
2.  $T_1$ - $T_n$  absorption of SiPc **1** (520 nm) as a function of ground-state depletion (690 nm) in argon-saturated PBS.
3. Effect of the umbelliferone ligand on the triplet excited state of SiPc **1**
4. Quantum chemistry data: Absolute Energies and Structures (Å)

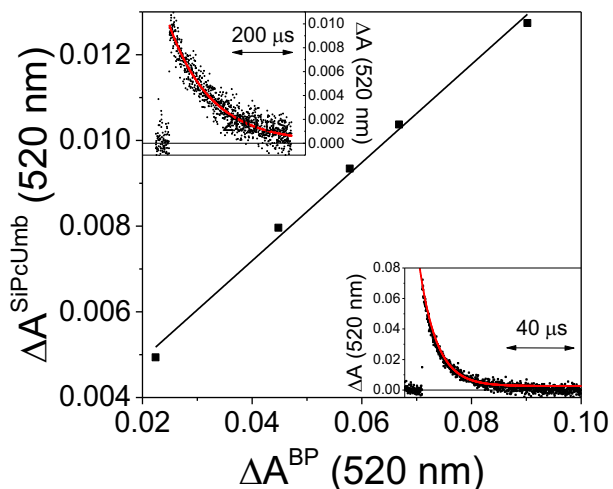

**Figure S1.** Comparative actinometry of **1** in argon-saturated PBS vs. benzophenone standard in acetonitrile. Plot shows the  $T_1$ - $T_n$  absorption change at 520 nm at varying laser energies. All solutions are argon saturated and have identical absorbance at 355 nm. All absorption changes are extrapolated to  $t = 0$  after the laser pulse. Inset shows a pair of kinetic traces for **1** (top) and

BP (bottom) measured at equal incident laser energy.

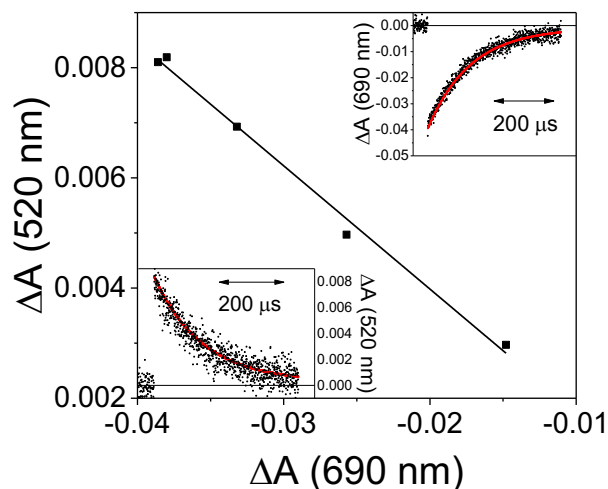

**Figure S2.**  $T_1$ - $T_n$  absorption of **1** (520 nm) as a function of ground-state depletion (690 nm) in argon-saturated PBS. Transients were measured at varying laser energies (two shown) and  $\Delta A$ 's are extrapolated to  $t = 0$  after laser excitation.

### Effect of the umbelliferone ligand on the triplet excited state of SiPc **1**.

Model compound **SiPcM1** was used to examine the effect of the umbelliferone ligand on the excited states of SiPc **1**.

**SiPcM1:**

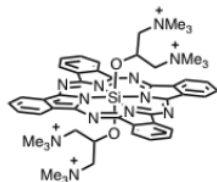

Stock solutions of **SiPcM1** and **1** were prepared in DMSO, then diluted into PBS. The optical densities of the 2 PBS solutions were matched (0.35) and transient absorption was carried out using 355-nm excitation as described above. Each solution was deoxygenated by Argon bubbling for about 30 minutes. The  $T_1$ - $T_n$  absorption and decay of the 2 compounds are shown in Figure S3.

As seen in Figure S3, the  $T_1$ - $T_n$  absorption signal is 3.5 times higher for the model compound (**SiPcM1**). Since the structure of the SiPc core is the same for all three compounds, it is reasonable to assume that they have the same  $T_1$ - $T_n$  extinction coefficient. This is also supported by identical  $T_1$ - $T_n$  spectra for the compounds (Figure 1a and Figure S4, albeit with different intensities). Thus, we conclude that relative  $\Phi_T$ 's decrease in the order **SiPcM1** (1.00) and **1** (0.285).

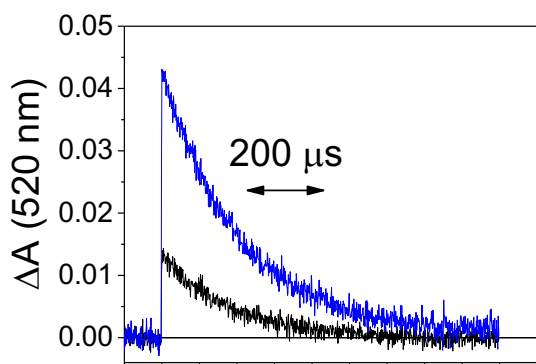

**Figure S3.**  $T_1$ - $T_n$  absorption of SiPcM1 (Blue) and **1** (Black) in argon-saturated PBS using 355-nm excitation. The optical densities of the solutions were matched at 355 nm.

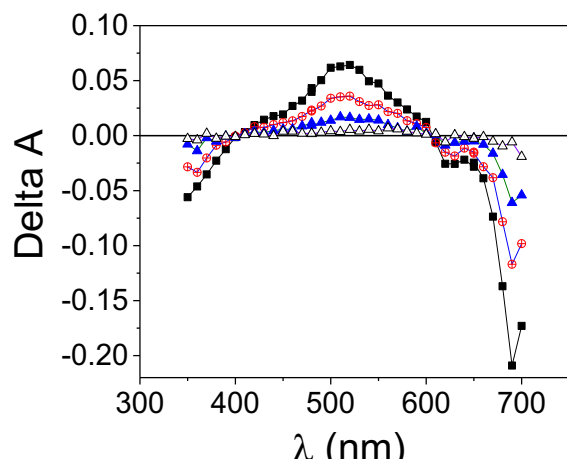

**Figure S4.** Transient absorption spectra obtained after 355-nm pulsed excitation of SiPcM1 in argon-saturated PBS (0, 117, 289 and 600  $\mu$ s in order of decreasing  $\Delta A$ ).

## Quantum Chemistry Data: Absolute Energies and Structures (Å)

### 1a. Neutral SiPc(OMe)(OPh)--HOH: reactant for OPh displacement

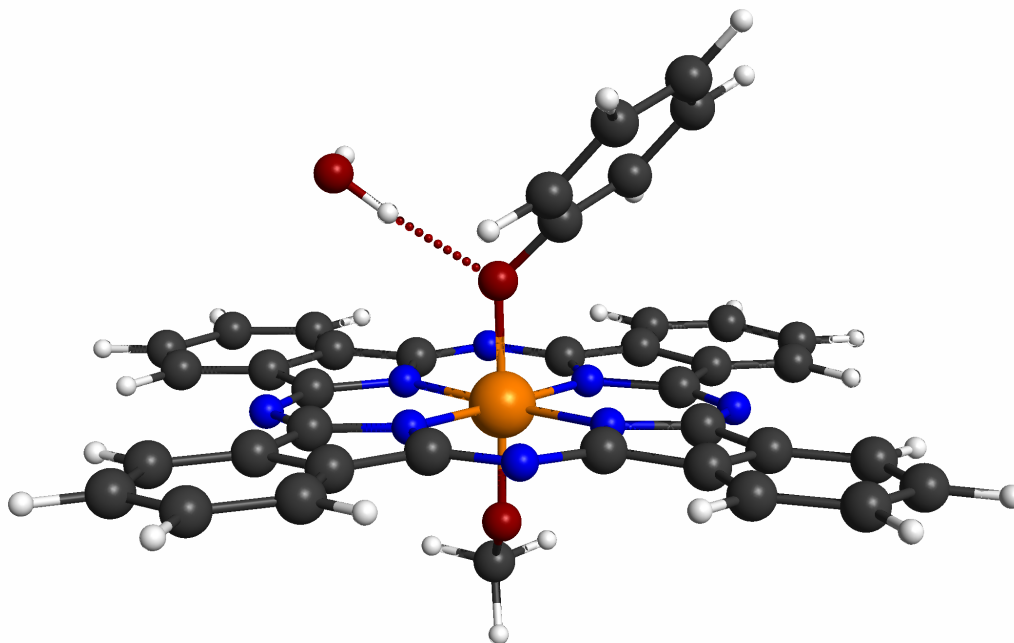

$E = -2453.86524$  hartree

| ATOM | CHARGE | X             | Y             | Z             |
|------|--------|---------------|---------------|---------------|
| SI   | 14.0   | -0.0700409056 | 0.3244606839  | -0.3282447539 |
| N    | 7.0    | -0.0435264607 | 2.2564788646  | -0.4006307259 |
| N    | 7.0    | -0.1445659664 | -1.6034215434 | -0.2125357789 |
| N    | 7.0    | 1.1512363926  | 0.3703326805  | 1.1776617733  |
| N    | 7.0    | -1.3279115083 | 0.2867566363  | -1.8099867973 |
| C    | 6.0    | -1.7766936246 | 1.3777881266  | -2.5253642981 |
| C    | 6.0    | -1.9341203325 | -0.8382863947 | -2.3336868410 |
| C    | 6.0    | 1.6873029182  | 1.4988961297  | 1.7623633042  |
| C    | 6.0    | 1.6880987572  | -0.7292628785 | 1.8183859337  |
| C    | 6.0    | -0.6812364331 | 3.0426553839  | -1.3440812648 |
| C    | 6.0    | 0.6834293788  | 3.0959907262  | 0.4199371165  |
| C    | 6.0    | -0.9241565798 | -2.4374282266 | -0.9928904092 |
| C    | 6.0    | 0.5975171722  | -2.3970398283 | 0.6395489253  |
| N    | 7.0    | -1.4712561554 | 2.6486194658  | -2.3260683149 |
| N    | 7.0    | 1.4710118272  | 2.7584832670  | 1.4263452721  |
| N    | 7.0    | -1.7595823191 | -2.0935886784 | -1.9574059923 |
| N    | 7.0    | 1.4524967874  | -2.0039766084 | 1.5672225792  |
| C    | 6.0    | 0.4897944463  | 4.4741544222  | 0.0056216745  |
| C    | 6.0    | -0.3647725170 | 4.4399892403  | -1.1079826066 |
| C    | 6.0    | 2.5908384797  | 1.1139132743  | 2.8344530586  |
| C    | 6.0    | 2.5950956968  | -0.2899634193 | 2.8657057140  |

|   |     |               |               |               |
|---|-----|---------------|---------------|---------------|
| C | 6.0 | 0.2939641448  | -3.7948108178 | 0.3920134360  |
| C | 6.0 | -0.6717682733 | -3.8202077706 | -0.6279054920 |
| C | 6.0 | -2.8098494851 | -0.4557046795 | -3.4279101250 |
| C | 6.0 | -2.7031994352 | 0.9400210239  | -3.5546919814 |
| C | 6.0 | 0.9850130405  | 5.6817815004  | 0.5048782105  |
| C | 6.0 | -0.7548051599 | 5.6126210992  | -1.7607106489 |
| C | 6.0 | 0.5956002984  | 6.8529470382  | -0.1442197893 |
| C | 6.0 | -0.2630900363 | 6.8187746811  | -1.2629292350 |
| C | 6.0 | 3.3685243954  | 1.8621128964  | 3.7216072195  |
| C | 6.0 | 3.3761297483  | -0.9941173645 | 3.7849921788  |
| C | 6.0 | 4.1544987102  | -0.2489703663 | 4.6710967742  |
| C | 6.0 | 4.1504280201  | 1.1607426785  | 4.6398115751  |
| C | 6.0 | 0.7758930477  | -4.9748180153 | 0.9654678755  |
| C | 6.0 | -1.1881433142 | -5.0266777792 | -1.1093010775 |
| C | 6.0 | -0.7087981354 | -6.2044461297 | -0.5374043150 |
| C | 6.0 | 0.2617061500  | -6.1789034390 | 0.4862954751  |
| C | 6.0 | -3.4244872923 | 1.6381259044  | -4.5271320826 |
| C | 6.0 | -3.6388224992 | -1.1999041760 | -4.2718710819 |
| C | 6.0 | -4.2532729228 | 0.8967698433  | -5.3685323255 |
| C | 6.0 | -4.3594279291 | -0.5042401030 | -5.2420696090 |
| H | 1.0 | -3.3393335602 | 2.7161186385  | -4.6209363703 |
| H | 1.0 | -4.8284884545 | 1.4049383970  | -6.1372749194 |
| H | 1.0 | -5.0153565784 | -1.0491899606 | -5.9150115568 |
| H | 1.0 | -3.7172883688 | -2.2778207446 | -4.1714895754 |
| H | 1.0 | -1.4151787477 | 5.5817989528  | -2.6216091023 |
| H | 1.0 | -0.5452023910 | 7.7514960494  | -1.7431692022 |
| H | 1.0 | 0.9586379699  | 7.8114273042  | 0.2159511575  |
| H | 1.0 | 1.6453278510  | 5.7033835677  | 1.3660901788  |
| H | 1.0 | 3.3627306053  | 2.9471798711  | 3.6941097174  |
| H | 1.0 | 4.7686528248  | 1.7086757494  | 5.3452831972  |
| H | 1.0 | 4.7750194524  | -0.7617551733 | 5.4005243649  |
| H | 1.0 | 3.3756351945  | -2.0793500873 | 3.8051521351  |
| H | 1.0 | 1.5230920277  | -4.9500493459 | 1.7522809090  |
| H | 1.0 | 0.6131866792  | -7.1169242403 | 0.9067328752  |
| H | 1.0 | -1.0867539540 | -7.1616680169 | -0.8853373183 |
| H | 1.0 | -1.9333085611 | -5.0419678824 | -1.8982998471 |
| O | 8.0 | 1.2918198714  | 0.3010689290  | -1.3884733539 |
| O | 8.0 | -1.4502398685 | 0.3033395184  | 0.8084376220  |
| C | 6.0 | 1.5278944685  | -0.5311676394 | -2.5046430854 |
| H | 1.0 | 2.4848470339  | -0.2365000144 | -2.9498680253 |
| H | 1.0 | 1.5983163620  | -1.5927859776 | -2.2270092517 |
| H | 1.0 | 0.7509847056  | -0.4289522476 | -3.2761675107 |
| C | 6.0 | -2.2915980854 | 1.3037643384  | 1.2166416570  |
| C | 6.0 | -3.5075194787 | 1.5245571156  | 0.5528634053  |
| C | 6.0 | -1.9840238190 | 2.0594619287  | 2.3582861544  |
| C | 6.0 | -4.3909948540 | 2.5030395937  | 1.0163596750  |
| C | 6.0 | -2.8727944105 | 3.0337632275  | 2.8161902545  |

|   |     |               |               |               |
|---|-----|---------------|---------------|---------------|
| C | 6.0 | -4.0784141436 | 3.2642194162  | 2.1463191807  |
| H | 1.0 | -3.7591917118 | 0.9170414396  | -0.3108858010 |
| H | 1.0 | -5.3302587763 | 2.6657765203  | 0.4932466282  |
| H | 1.0 | -4.7692254803 | 4.0223773551  | 2.5052219243  |
| H | 1.0 | -2.6223095119 | 3.6115853562  | 3.7025267708  |
| H | 1.0 | -1.0549431218 | 1.8643771782  | 2.8850031689  |
| O | 8.0 | -1.8923694636 | -1.7818085432 | 2.6790929280  |
| H | 1.0 | -1.6848066074 | -1.0680540352 | 2.0417045709  |
| H | 1.0 | -2.5067551299 | -2.3511631054 | 2.1907115917  |

**1b. Neutral SiPc(OMe)(PhO-H-OH): transition state for OPh displacement**

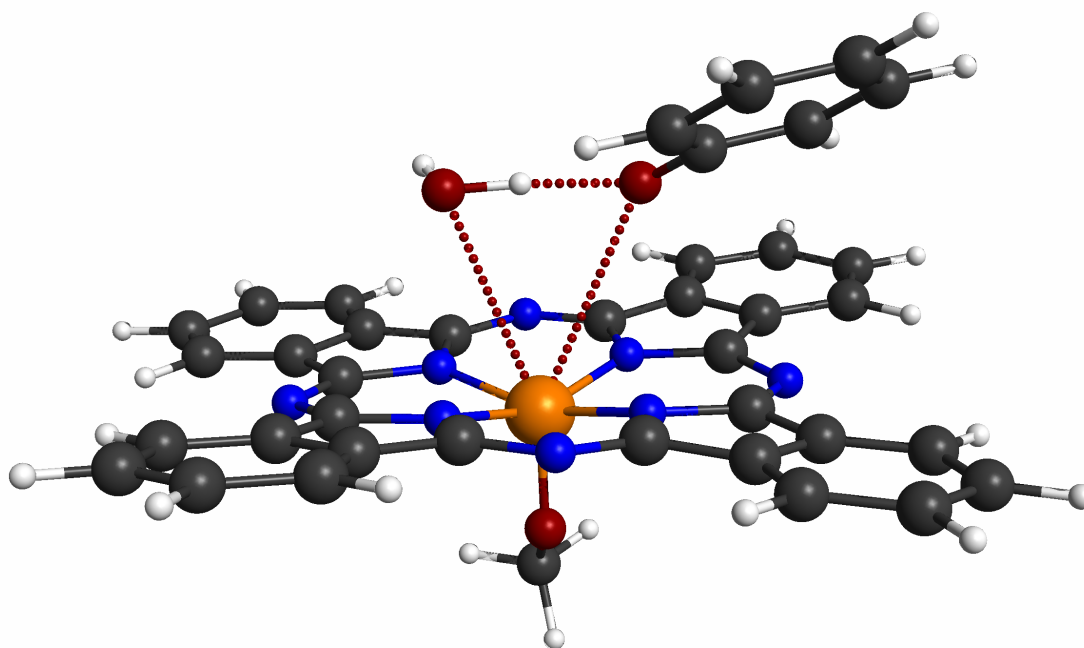

$E = -2453.80916 \text{ hartree}$

| ATOM | CHARGE | X             | Y             | Z             |
|------|--------|---------------|---------------|---------------|
| SI   | 14.0   | 0.3058266926  | 0.1231556596  | -0.5571052557 |
| N    | 7.0    | 0.0229698074  | 1.9986282612  | -0.3573570420 |
| N    | 7.0    | 0.1242364024  | -1.7747377382 | -0.3550214496 |
| N    | 7.0    | 1.2679536052  | 0.1582407886  | 1.0914630314  |
| N    | 7.0    | -1.1960711027 | 0.0663730350  | -1.7351726400 |
| C    | 6.0    | -1.7992591944 | 1.1659414640  | -2.3467398427 |
| C    | 6.0    | -1.8307856781 | -1.0565896978 | -2.2651109540 |
| C    | 6.0    | 1.6825021098  | 1.2784486084  | 1.8096463550  |
| C    | 6.0    | 1.8305880069  | -0.9388934034 | 1.7438754634  |
| C    | 6.0    | -0.6727635143 | 2.8155152284  | -1.2483274591 |
| C    | 6.0    | 0.6742598104  | 2.8650352323  | 0.5177178236  |
| C    | 6.0    | -0.6445857202 | -2.6443756883 | -1.1321830577 |
| C    | 6.0    | 0.9050997009  | -2.5899796173 | 0.4659616701  |
| N    | 7.0    | -1.5086810635 | 2.4370021603  | -2.1842062286 |
| N    | 7.0    | 1.4294645571  | 2.5395945086  | 1.5403975115  |
| N    | 7.0    | -1.5635742026 | -2.3187322090 | -2.0111472679 |
| N    | 7.0    | 1.7121653831  | -2.2083639417 | 1.4281256063  |
| C    | 6.0    | 0.4316502987  | 4.2408605995  | 0.1461857530  |
| C    | 6.0    | -0.4013350783 | 4.2089021991  | -0.9774776772 |
| C    | 6.0    | 2.5009313356  | 0.8870593821  | 2.9317155977  |
| C    | 6.0    | 2.6031293193  | -0.5085081224 | 2.8837529600  |
| C    | 6.0    | 0.6645731763  | -3.9820485322 | 0.1711522899  |

|   |     |               |               |               |
|---|-----|---------------|---------------|---------------|
| C | 6.0 | -0.3185441849 | -4.0166110460 | -0.8265729313 |
| C | 6.0 | -2.8503154958 | -0.6647633396 | -3.2080966856 |
| C | 6.0 | -2.8228182534 | 0.7340132986  | -3.2659593047 |
| C | 6.0 | 0.8804782937  | 5.4483091097  | 0.6890572361  |
| C | 6.0 | -0.8214513467 | 5.3832341605  | -1.6088106721 |
| C | 6.0 | 0.4706108360  | 6.6212519710  | 0.0575294360  |
| C | 6.0 | -0.3675549923 | 6.5891940430  | -1.0780358107 |
| C | 6.0 | 3.1328636507  | 1.6321476132  | 3.9337704206  |
| C | 6.0 | 3.3429947897  | -1.2201672937 | 3.8353442150  |
| C | 6.0 | 3.9740642469  | -0.4816623823 | 4.8326196011  |
| C | 6.0 | 3.8695498185  | 0.9269761647  | 4.8817279582  |
| C | 6.0 | 1.2020639862  | -5.1581025393 | 0.7078545338  |
| C | 6.0 | -0.8061960679 | -5.2283418270 | -1.3297808304 |
| C | 6.0 | -0.2680194572 | -6.3989560288 | -0.8024945949 |
| C | 6.0 | 0.7246087309  | -6.3642921184 | 0.2032041388  |
| C | 6.0 | -3.6824862723 | 1.4486869697  | -4.1078338437 |
| C | 6.0 | -3.7408688758 | -1.4098309292 | -3.9895891482 |
| C | 6.0 | -4.5686281214 | 0.7104042597  | -4.8876031697 |
| C | 6.0 | -4.5974601270 | -0.7014084257 | -4.8282357849 |
| H | 1.0 | -3.6539225335 | 2.5325828107  | -4.1484169874 |
| H | 1.0 | -5.2521442803 | 1.2261257631  | -5.5557168318 |
| H | 1.0 | -5.3034680276 | -1.2424890339 | -5.4515517792 |
| H | 1.0 | -3.7589046209 | -2.4937115347 | -3.9415337423 |
| H | 1.0 | -1.4677880574 | 5.3530284458  | -2.4799063935 |
| H | 1.0 | -0.6639916343 | 7.5247914873  | -1.5434424569 |
| H | 1.0 | 0.8011236175  | 7.5810960869  | 0.4440296329  |
| H | 1.0 | 1.5228698338  | 5.4675682438  | 1.5634497302  |
| H | 1.0 | 3.0488950379  | 2.7134766521  | 3.9674113075  |
| H | 1.0 | 4.3756708354  | 1.4664667377  | 5.6771594323  |
| H | 1.0 | 4.5590476434  | -0.9944040894 | 5.5907877100  |
| H | 1.0 | 3.4184539510  | -2.3018476229 | 3.7936099199  |
| H | 1.0 | 1.9605518836  | -5.1251546084 | 1.4830672939  |
| H | 1.0 | 1.1189797948  | -7.3000764408 | 0.5886538794  |
| H | 1.0 | -0.6163033770 | -7.3607014693 | -1.1679503849 |
| H | 1.0 | -1.5710783305 | -5.2496854741 | -2.0990992262 |
| O | 8.0 | 1.5877271121  | 0.2168027202  | -1.6151086729 |
| O | 8.0 | -2.7477588484 | 0.9804851178  | 0.6111725645  |
| C | 6.0 | 1.8253311966  | -0.5937552413 | -2.7661352198 |
| H | 1.0 | 2.6827499607  | -0.1685016822 | -3.2933320364 |
| H | 1.0 | 2.0620870581  | -1.6259449080 | -2.4828661982 |
| H | 1.0 | 0.9621635988  | -0.5935276284 | -3.4421218124 |
| C | 6.0 | -3.1340081326 | 2.1288275076  | 1.0908211952  |
| C | 6.0 | -4.0618269074 | 2.9536539467  | 0.3801517735  |
| C | 6.0 | -2.6728531169 | 2.6438365794  | 2.3433705330  |
| C | 6.0 | -4.4932657926 | 4.1765528766  | 0.8846851088  |
| C | 6.0 | -3.1156553674 | 3.8692003064  | 2.8370612138  |
| C | 6.0 | -4.0308784016 | 4.6524226295  | 2.1206075841  |



|   |     |               |               |               |
|---|-----|---------------|---------------|---------------|
| H | 1.0 | -4.4247266693 | 2.5899503950  | -0.5792174474 |
| H | 1.0 | -5.2027203891 | 4.7710310613  | 0.3092994967  |
| H | 1.0 | -4.3713838404 | 5.6086706461  | 2.5103450902  |
| H | 1.0 | -2.7415625877 | 4.2217770720  | 3.7980782575  |
| H | 1.0 | -1.9682285285 | 2.0424798234  | 2.9149272528  |
| O | 8.0 | -1.4351072183 | -0.6886834647 | 2.1497309802  |
| H | 1.0 | -1.9610724237 | -0.0045424539 | 1.6232261569  |
| H | 1.0 | -1.8545033074 | -1.5289423043 | 1.9070274950  |

**1c. Neutral SiPc(OMe)(OH)--HOPh: product for OPh displacement**

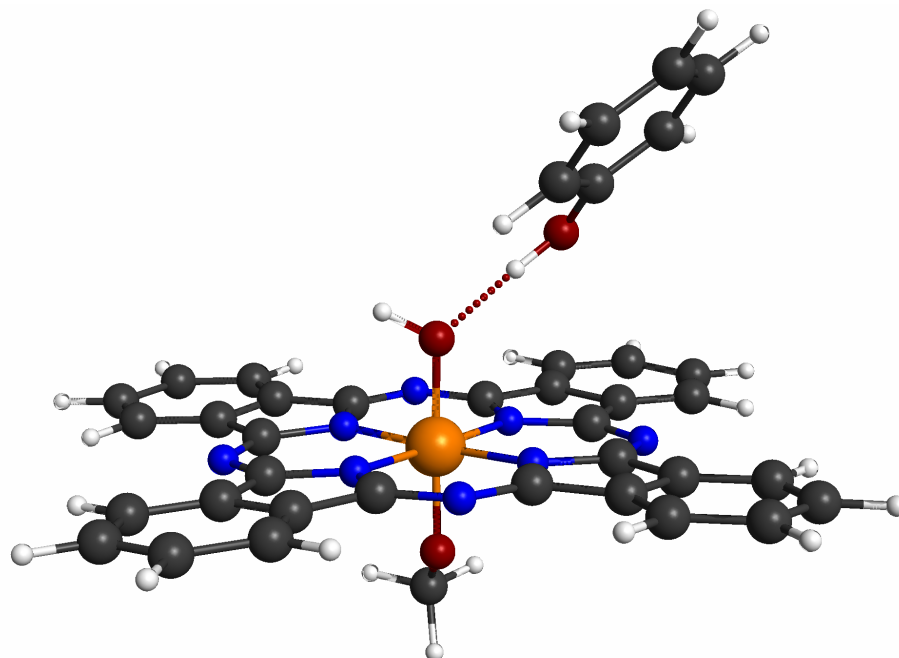

$E = -2453.87819 \text{ hartree}$

| ATOM | CHARGE | X             | Y             | Z             |
|------|--------|---------------|---------------|---------------|
| SI   | 14.0   | 0.1578222005  | 0.1116505124  | -0.3146883176 |
| N    | 7.0    | 0.1852416243  | 2.0386220301  | -0.3734427595 |
| N    | 7.0    | 0.0701698415  | -1.8297736239 | -0.2020541990 |
| N    | 7.0    | 1.4219822039  | 0.1267612279  | 1.1636798775  |
| N    | 7.0    | -1.1361574326 | 0.0808418387  | -1.7643293314 |
| C    | 6.0    | -1.6091275504 | 1.1801941884  | -2.4502077179 |
| C    | 6.0    | -1.7500651113 | -1.0396216069 | -2.2891448540 |
| C    | 6.0    | 1.9564140453  | 1.2506708882  | 1.7558892151  |
| C    | 6.0    | 1.9712820784  | -0.9781282839 | 1.7818789154  |
| C    | 6.0    | -0.4912566686 | 2.8350554146  | -1.2749482500 |
| C    | 6.0    | 0.9090535533  | 2.8648885853  | 0.4617036841  |
| C    | 6.0    | -0.7243937229 | -2.6558516589 | -0.9773198090 |
| C    | 6.0    | 0.8334440876  | -2.6348467155 | 0.6247798968  |
| N    | 7.0    | -1.3049306435 | 2.4498548070  | -2.2423363625 |
| N    | 7.0    | 1.7168710755  | 2.5140509227  | 1.4471693057  |
| N    | 7.0    | -1.5720884499 | -2.2986431110 | -1.9273530273 |
| N    | 7.0    | 1.7145803024  | -2.2510358015 | 1.5331316824  |
| C    | 6.0    | 0.6839635161  | 4.2517230956  | 0.0881547053  |
| C    | 6.0    | -0.1937517292 | 4.2327333413  | -1.0080845231 |
| C    | 6.0    | 2.8858178634  | 0.8566722317  | 2.8027669258  |
| C    | 6.0    | 2.8994924545  | -0.5481498674 | 2.8146554527  |
| C    | 6.0    | 0.5114793584  | -4.0284065137 | 0.3776467066  |

|   |     |               |               |               |
|---|-----|---------------|---------------|---------------|
| C | 6.0 | -0.4742165090 | -4.0412768006 | -0.6243031628 |
| C | 6.0 | -2.6493218826 | -0.6457939762 | -3.3608612501 |
| C | 6.0 | -2.5544028223 | 0.7518781425  | -3.4673465367 |
| C | 6.0 | 1.1693815709  | 5.4536656219  | 0.6090286479  |
| C | 6.0 | -0.6176076397 | 5.4151697078  | -1.6195572539 |
| C | 6.0 | 0.7472786213  | 6.6354544996  | -0.0002102338 |
| C | 6.0 | -0.1347571235 | 6.6164553267  | -1.1002276061 |
| C | 6.0 | 3.6776023191  | 1.5968776862  | 3.6841658032  |
| C | 6.0 | 3.7027914473  | -1.2595006918 | 3.7088552411  |
| C | 6.0 | 4.4954470267  | -0.5217690482 | 4.5885368381  |
| C | 6.0 | 4.4826776497  | 0.8881370957  | 4.5763777384  |
| C | 6.0 | 0.9909775377  | -5.2155602088 | 0.9394544844  |
| C | 6.0 | -1.0109202806 | -5.2416983209 | -1.0994496631 |
| C | 6.0 | -0.5333802067 | -6.4255875660 | -0.5396663893 |
| C | 6.0 | 0.4556065431  | -6.4126580679 | 0.4668840749  |
| C | 6.0 | -3.2999939477 | 1.4602021621  | -4.4129008999 |
| C | 6.0 | -3.4926089367 | -1.3818842501 | -4.1970655941 |
| C | 6.0 | -4.1429863061 | 0.7269925974  | -5.2480036993 |
| C | 6.0 | -4.2386898040 | -0.6759502766 | -5.1407777154 |
| H | 1.0 | -3.2237177447 | 2.5401239351  | -4.4910638598 |
| H | 1.0 | -4.7377887665 | 1.2439776598  | -5.9956820489 |
| H | 1.0 | -4.9060227321 | -1.2148487813 | -5.8073433893 |
| H | 1.0 | -3.5630073891 | -2.4616341291 | -4.1112460446 |
| H | 1.0 | -1.2964600896 | 5.3960578051  | -2.4663053708 |
| H | 1.0 | -0.4425587938 | 7.5565795626  | -1.5492360390 |
| H | 1.0 | 1.1029792956  | 7.5898760984  | 0.3776682326  |
| H | 1.0 | 1.8478491385  | 5.4637623617  | 1.4562659144  |
| H | 1.0 | 3.6647858522  | 2.6822089868  | 3.6719249444  |
| H | 1.0 | 5.1122219517  | 1.4305544245  | 5.2760690834  |
| H | 1.0 | 5.1342112186  | -1.0409142543 | 5.2974529401  |
| H | 1.0 | 3.7088906218  | -2.3449478931 | 3.7146965669  |
| H | 1.0 | 1.7522448694  | -5.2009459437 | 1.7129363537  |
| H | 1.0 | 0.8042187540  | -7.3554187402 | 0.8789783384  |
| H | 1.0 | -0.9274212176 | -7.3780168420 | -0.8829006699 |
| H | 1.0 | -1.7708638899 | -5.2470186882 | -1.8743752451 |
| O | 8.0 | 1.4936424403  | 0.0822187575  | -1.4059706276 |
| O | 8.0 | -3.6107177243 | 1.2674713526  | 0.2619836038  |
| C | 6.0 | 1.6969041480  | -0.7567120921 | -2.5232809006 |
| H | 1.0 | 2.6482495481  | -0.4766993529 | -2.9895676325 |
| H | 1.0 | 1.7594320246  | -1.8181810445 | -2.2435181347 |
| H | 1.0 | 0.9059042981  | -0.6469567090 | -3.2792495642 |
| C | 6.0 | -3.9992602059 | 2.2398494127  | 1.1278867368  |
| C | 6.0 | -5.2017459206 | 2.9143909397  | 0.8603528708  |
| C | 6.0 | -3.2533992117 | 2.5836627925  | 2.2680941358  |
| C | 6.0 | -5.6469944658 | 3.9181766743  | 1.7205871267  |
| C | 6.0 | -3.7112928679 | 3.5904649699  | 3.1211154937  |
| C | 6.0 | -4.9068999277 | 4.2652016998  | 2.8566762669  |

|   |     |               |               |               |
|---|-----|---------------|---------------|---------------|
| H | 1.0 | -5.7699415566 | 2.6411273145  | -0.0248091685 |
| H | 1.0 | -6.5789316146 | 4.4338851188  | 1.5006894498  |
| H | 1.0 | -5.2570216882 | 5.0482274035  | 3.5237013038  |
| H | 1.0 | -3.1247409718 | 3.8478429854  | 4.0001309700  |
| H | 1.0 | -2.3228734038 | 2.0614922164  | 2.4724116829  |
| O | 8.0 | -1.1678372459 | 0.2550653751  | 0.8408701462  |
| H | 1.0 | -2.7209741426 | 0.9027463044  | 0.5150064272  |
| H | 1.0 | -1.2481089268 | -0.5207957013 | 1.4176848358  |

**2a. Neutral SiPc(OPh)(OMe)--HOH: reactant for OMe displacement**

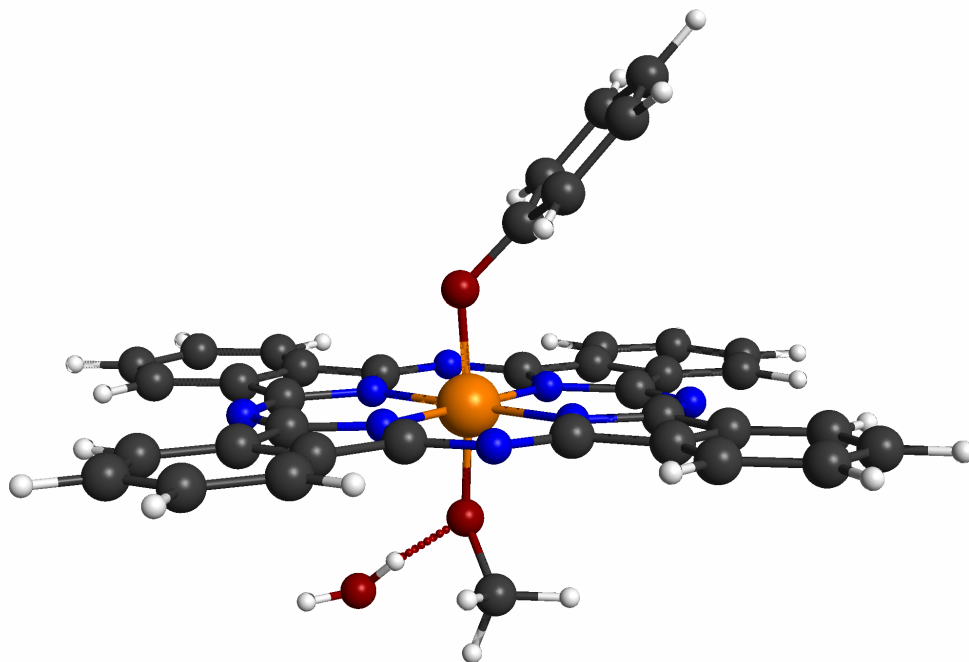

$E = -2453.86727 \text{ hartree}$

| ATOM | CHARGE | X             | Y             | Z             |
|------|--------|---------------|---------------|---------------|
| SI   | 14.0   | -0.0589498846 | 0.0992167026  | -0.0581812635 |
| N    | 7.0    | -0.0353725220 | 2.0331469636  | -0.0986935777 |
| N    | 7.0    | -0.0922720284 | -1.8337505737 | -0.0133328066 |
| N    | 7.0    | 1.2426947444  | 0.1148724581  | 1.3819610121  |
| N    | 7.0    | -1.3668632358 | 0.0923668797  | -1.4916924051 |
| C    | 6.0    | -1.8676362292 | 1.1986181425  | -2.1489862662 |
| C    | 6.0    | -1.9425445503 | -1.0268220473 | -2.0588430753 |
| C    | 6.0    | 1.7751892010  | 1.2335081216  | 1.9907799360  |
| C    | 6.0    | 1.7956235490  | -0.9951707367 | 1.9869445148  |
| C    | 6.0    | -0.7567415379 | 2.8435020698  | -0.9568438240 |
| C    | 6.0    | 0.6915945067  | 2.8590551241  | 0.7424773452  |
| C    | 6.0    | -0.8791967218 | -2.6524683033 | -0.7958180325 |
| C    | 6.0    | 0.6640342351  | -2.6409530140 | 0.8116715957  |
| N    | 7.0    | -1.5891187358 | 2.4678662234  | -1.9121777806 |
| N    | 7.0    | 1.5201947459  | 2.4999569250  | 1.7072132065  |
| N    | 7.0    | -1.7358545816 | -2.2915515283 | -1.7354245380 |
| N    | 7.0    | 1.5412435366  | -2.2659558466 | 1.7259224672  |
| C    | 6.0    | 0.4301723113  | 4.2462815445  | 0.4086935276  |
| C    | 6.0    | -0.4784440530 | 4.2363474718  | -0.6624939964 |
| C    | 6.0    | 2.7098368256  | 0.8290459278  | 3.0268578221  |
| C    | 6.0    | 2.7261504918  | -0.5756537924 | 3.0209924878  |
| C    | 6.0    | 0.3457280193  | -4.0355961286 | 0.5553681609  |

|   |     |               |               |               |
|---|-----|---------------|---------------|---------------|
| C | 6.0 | -0.6305124707 | -4.0424030910 | -0.4536071079 |
| C | 6.0 | -2.8517936460 | -0.6258345554 | -3.1191810322 |
| C | 6.0 | -2.8014882891 | 0.7763453303  | -3.1783198054 |
| C | 6.0 | 0.9092885214  | 5.4457711772  | 0.9442158166  |
| C | 6.0 | -0.9411736206 | 5.4256910444  | -1.2337693038 |
| C | 6.0 | 0.4493822508  | 6.6318893800  | 0.3748440102  |
| C | 6.0 | -0.4645946062 | 6.6219843376  | -0.7005415959 |
| C | 6.0 | 3.5043462120  | 1.5607721657  | 3.9132569097  |
| C | 6.0 | 3.5359066286  | -1.2961815371 | 3.9024564972  |
| C | 6.0 | 4.3305491471  | -0.5673566539 | 4.7872712264  |
| C | 6.0 | 4.3147934019  | 0.8429179343  | 4.7926588830  |
| C | 6.0 | 0.8190839185  | -5.2243061837 | 1.1161464110  |
| C | 6.0 | -1.1680545395 | -5.2379356239 | -0.9363908794 |
| C | 6.0 | -0.6970246086 | -6.4262522578 | -0.3776632053 |
| C | 6.0 | 0.2843399086  | -6.4195049608 | 0.6348538046  |
| C | 6.0 | -3.5695233040 | 1.4927459946  | -4.0995425603 |
| C | 6.0 | -3.6717928068 | -1.3601156251 | -3.9796858361 |
| C | 6.0 | -4.3901634431 | 0.7615664317  | -4.9583816178 |
| C | 6.0 | -4.4408427147 | -0.6465906158 | -4.8989784646 |
| H | 1.0 | -3.5274444774 | 2.5765181494  | -4.1413072985 |
| H | 1.0 | -5.0022905079 | 1.2842909213  | -5.6878226200 |
| H | 1.0 | -5.0914584877 | -1.1834501685 | -5.5834395725 |
| H | 1.0 | -3.7074112141 | -2.4438230479 | -3.9304104932 |
| H | 1.0 | -1.6438190996 | 5.4131779242  | -2.0608694573 |
| H | 1.0 | -0.8008588536 | 7.5666960447  | -1.1183742794 |
| H | 1.0 | 0.7991741923  | 7.5840209920  | 0.7637419152  |
| H | 1.0 | 1.6119899465  | 5.4486349185  | 1.7713690105  |
| H | 1.0 | 3.4891609131  | 2.6460842134  | 3.9140394902  |
| H | 1.0 | 4.9463449084  | 1.3779654465  | 5.4961439932  |
| H | 1.0 | 4.9738947069  | -1.0936017485 | 5.4866845076  |
| H | 1.0 | 3.5445454789  | -2.3815487400 | 3.8947732469  |
| H | 1.0 | 1.5737311665  | -5.2144154207 | 1.8961934935  |
| H | 1.0 | 0.6276890299  | -7.3643946532 | 1.0465845082  |
| H | 1.0 | -1.0917073809 | -7.3761597493 | -0.7270869200 |
| H | 1.0 | -1.9234513395 | -5.2384050555 | -1.7157890475 |
| O | 8.0 | 1.2154622038  | -0.0499394101 | -1.2450902800 |
| O | 8.0 | -1.3190158169 | 0.0568611887  | 1.1687592376  |
| C | 6.0 | 2.2426868459  | 0.8818568205  | -1.5420676356 |
| H | 1.0 | 2.9541252804  | 0.3852652842  | -2.2102868138 |
| H | 1.0 | 1.8527612398  | 1.7722880912  | -2.0512834666 |
| H | 1.0 | 2.7882212815  | 1.2005374108  | -0.6433898409 |
| C | 6.0 | -2.4624324986 | 0.7760015395  | 1.3397890550  |
| C | 6.0 | -3.6825459662 | 0.2939708795  | 0.8359729007  |
| C | 6.0 | -2.4589560602 | 1.9577493821  | 2.0998838221  |
| C | 6.0 | -4.8684207424 | 0.9925305523  | 1.0709530038  |
| C | 6.0 | -3.6492565193 | 2.6515311168  | 2.3289691454  |
| C | 6.0 | -4.8593433947 | 2.1772837985  | 1.8136538995  |

|   |     |               |               |               |
|---|-----|---------------|---------------|---------------|
| H | 1.0 | -3.6908397717 | -0.6357416484 | 0.2746673736  |
| H | 1.0 | -5.8038117836 | 0.6050592804  | 0.6739911257  |
| H | 1.0 | -5.7839108478 | 2.7188068863  | 1.9949311858  |
| H | 1.0 | -3.6289035275 | 3.5652508212  | 2.9183895606  |
| H | 1.0 | -1.5227998335 | 2.3140974506  | 2.5193805546  |
| O | 8.0 | 2.2611732563  | -2.4048434013 | -2.3211311226 |
| H | 1.0 | 1.8092178845  | -1.6161899034 | -1.9495667274 |
| H | 1.0 | 2.8961916537  | -2.6496876764 | -1.6308545812 |

## 2b. Neutral SiPc(OPh)(MeO-H-OH): transition state for OMe displacement

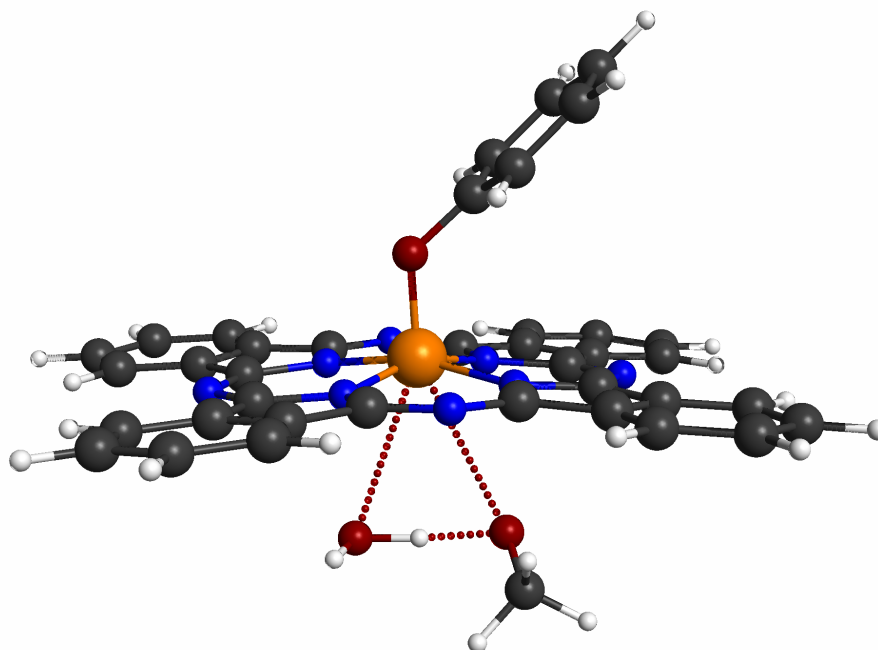

$E = -2453.78154 \text{ hartree}$

| ATOM | CHARGE | X             | Y             | Z             |
|------|--------|---------------|---------------|---------------|
| SI   | 14.0   | -0.3128740654 | -0.0036112089 | 0.2028841398  |
| N    | 7.0    | -0.0651887330 | 1.8771177467  | -0.0259214246 |
| N    | 7.0    | -0.1781685743 | -1.9026066536 | 0.0840669622  |
| N    | 7.0    | 1.1962808216  | -0.0103119904 | 1.3661266222  |
| N    | 7.0    | -1.3624711494 | -0.0176210782 | -1.3826117433 |
| C    | 6.0    | -1.8280355829 | 1.0874607193  | -2.0961827360 |
| C    | 6.0    | -1.9681525377 | -1.1315754707 | -1.9710378994 |
| C    | 6.0    | 1.7606028869  | 1.1056962218  | 1.9934037802  |
| C    | 6.0    | 1.7947183124  | -1.1235319684 | 1.9612344002  |
| C    | 6.0    | -0.7158960534 | 2.7048685262  | -0.9413846426 |
| C    | 6.0    | 0.7069041415  | 2.7167464935  | 0.7639683895  |
| C    | 6.0    | -0.9688766951 | -2.7431809239 | -0.6963966136 |
| C    | 6.0    | 0.6280309888  | -2.7386549760 | 0.8465026700  |
| N    | 7.0    | -1.5610409596 | 2.3534398584  | -1.8791708725 |
| N    | 7.0    | 1.5244029066  | 2.3695965937  | 1.7378451816  |
| N    | 7.0    | -1.8179728115 | -2.3921732048 | -1.6353588373 |
| N    | 7.0    | 1.5417327817  | -2.3879963962 | 1.7249047332  |
| C    | 6.0    | 0.5191275277  | 4.0978826737  | 0.3764086377  |
| C    | 6.0    | -0.3707836374 | 4.0878386565  | -0.7037526326 |
| C    | 6.0    | 2.7208392555  | 0.6911695914  | 2.9891097729  |
| C    | 6.0    | 2.7513685013  | -0.7080339128 | 2.9600426428  |
| C    | 6.0    | 0.3231810152  | -4.1230231702 | 0.5747352321  |



|   |     |               |               |               |
|---|-----|---------------|---------------|---------------|
| C | 6.0 | -0.6912844503 | -4.1260405712 | -0.3907720574 |
| C | 6.0 | -2.8136197555 | -0.7260451249 | -3.0674889018 |
| C | 6.0 | -2.7220633877 | 0.6687870631  | -3.1483147220 |
| C | 6.0 | 1.0536607799  | 5.2905145269  | 0.8723120541  |
| C | 6.0 | -0.7647016934 | 5.2712564742  | -1.3359494052 |
| C | 6.0 | 0.6601022360  | 6.4723763715  | 0.2468307605  |
| C | 6.0 | -0.2364680903 | 6.4632037871  | -0.8436359301 |
| C | 6.0 | 3.5313043412  | 1.4215700787  | 3.8652408934  |
| C | 6.0 | 3.5913403434  | -1.4383810668 | 3.8079840643  |
| C | 6.0 | 4.3970558757  | -0.7147063180 | 4.6832274284  |
| C | 6.0 | 4.3670785553  | 0.6977279806  | 4.7117747770  |
| C | 6.0 | 0.8444122607  | -5.3151683944 | 1.0903104592  |
| C | 6.0 | -1.2244430968 | -5.3212486939 | -0.8863293785 |
| C | 6.0 | -0.7104420608 | -6.5088575744 | -0.3721026416 |
| C | 6.0 | 0.3111726343  | -6.5060251355 | 0.6042381989  |
| C | 6.0 | -3.4251060985 | 1.3923813709  | -4.1185843387 |
| C | 6.0 | -3.6114188995 | -1.4583349674 | -3.9542561903 |
| C | 6.0 | -4.2220770498 | 0.6673362258  | -5.0000589270 |
| C | 6.0 | -4.3140454862 | -0.7407386136 | -4.9184808978 |
| H | 1.0 | -3.3480136216 | 2.4731119646  | -4.1769899778 |
| H | 1.0 | -4.7846569716 | 1.1901915440  | -5.7681042134 |
| H | 1.0 | -4.9455526018 | -1.2706335229 | -5.6257361541 |
| H | 1.0 | -3.6768124171 | -2.5394363151 | -3.8888499863 |
| H | 1.0 | -1.4526034479 | 5.2575753476  | -2.1750761758 |
| H | 1.0 | -0.5177106291 | 7.4052763523  | -1.3053264168 |
| H | 1.0 | 1.0503370377  | 7.4216340822  | 0.6025768890  |
| H | 1.0 | 1.7449720223  | 5.2921769583  | 1.7087201461  |
| H | 1.0 | 3.5034965888  | 2.5061313598  | 3.8828050202  |
| H | 1.0 | 5.0090936374  | 1.2267069592  | 5.4100532035  |
| H | 1.0 | 5.0618468083  | -1.2437959783 | 5.3597481654  |
| H | 1.0 | 3.6090447520  | -2.5229881345 | 3.7816923342  |
| H | 1.0 | 1.6306156775  | -5.3068560083 | 1.8380942915  |
| H | 1.0 | 0.6854907597  | -7.4538995313 | 0.9800948012  |
| H | 1.0 | -1.0998788918 | -7.4589490131 | -0.7264845439 |
| H | 1.0 | -2.0074020374 | -5.3182058546 | -1.6376175720 |
| O | 8.0 | 1.2945285380  | 1.0594035530  | -2.3550711707 |
| O | 8.0 | -1.5004847428 | 0.0110907403  | 1.4032590138  |
| C | 6.0 | 2.3424379569  | 1.9401199676  | -2.2095690647 |
| H | 1.0 | 3.3455448558  | 1.4537488897  | -2.2441537527 |
| H | 1.0 | 2.3635857916  | 2.7316145062  | -2.9922294289 |
| H | 1.0 | 2.3329852633  | 2.4977638294  | -1.2404984072 |
| C | 6.0 | -2.6313822901 | 0.7972461389  | 1.4973102625  |
| C | 6.0 | -3.8345412508 | 0.3523457542  | 0.9373004833  |
| C | 6.0 | -2.5884621004 | 2.0008904429  | 2.2100911524  |
| C | 6.0 | -4.9895782078 | 1.1254092785  | 1.0753119353  |
| C | 6.0 | -3.7492698634 | 2.7669823021  | 2.3416834143  |
| C | 6.0 | -4.9513989027 | 2.3361685525  | 1.7730862234  |

|   |     |               |               |               |
|---|-----|---------------|---------------|---------------|
| H | 1.0 | -3.8604246340 | -0.5967756862 | 0.4103377425  |
| H | 1.0 | -5.9210415840 | 0.7762992792  | 0.6373172653  |
| H | 1.0 | -5.8517603251 | 2.9351252694  | 1.8772096382  |
| H | 1.0 | -3.7107737190 | 3.7021567023  | 2.8942063135  |
| H | 1.0 | -1.6554435886 | 2.3210509610  | 2.6642948753  |
| O | 8.0 | 2.1608292107  | -1.1267928992 | -1.5099095774 |
| H | 1.0 | 1.8063181295  | -0.2263461724 | -1.9300134871 |
| H | 1.0 | 2.8758464602  | -0.8338671947 | -0.9248161894 |

## 2c. Neutral SiPc(OPh)(OH)--HOMe: product for OMe displacement

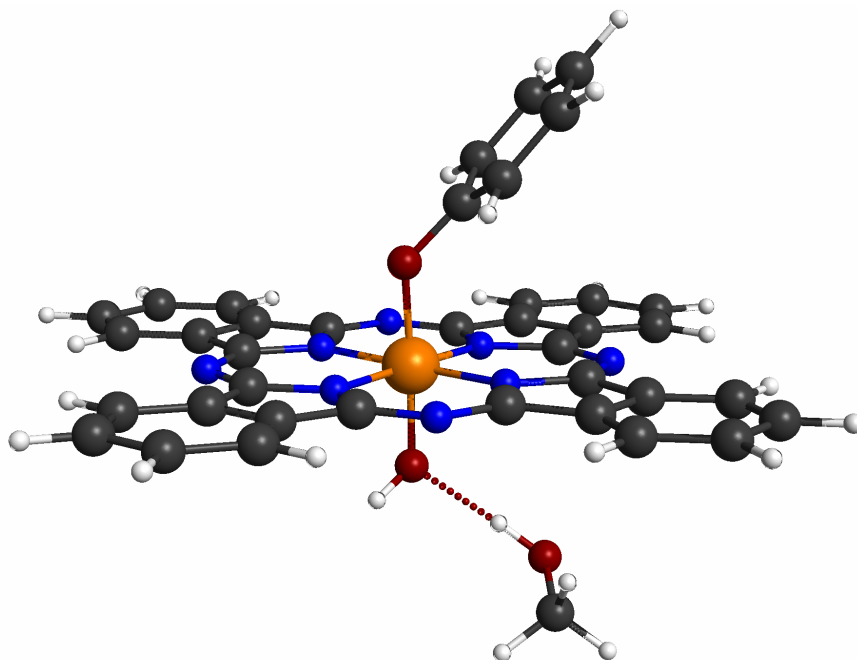

$E = -2453.87073$  hartree

| ATOM | CHARGE | X             | Y             | Z             |
|------|--------|---------------|---------------|---------------|
| SI   | 14.0   | -0.0557724991 | -0.0500186515 | 0.0046561922  |
| N    | 7.0    | 0.0255065396  | 1.8903437387  | -0.0595404274 |
| N    | 7.0    | -0.1430878876 | -1.9891061607 | 0.0992012664  |
| N    | 7.0    | 1.2699292923  | -0.0596532607 | 1.4291206687  |
| N    | 7.0    | -1.3370143440 | -0.0405207606 | -1.4286042055 |
| C    | 6.0    | -1.8302264386 | 1.0732097515  | -2.0835039763 |
| C    | 6.0    | -1.9195819451 | -1.1566889212 | -2.0009347860 |
| C    | 6.0    | 1.8300547952  | 1.0579813559  | 2.0220059203  |
| C    | 6.0    | 1.7452534992  | -1.1718399845 | 2.0998119862  |
| C    | 6.0    | -0.6827324759 | 2.7083874501  | -0.9165285555 |
| C    | 6.0    | 0.7977389816  | 2.7001021718  | 0.7501036609  |
| C    | 6.0    | -0.9163674147 | -2.7982197033 | -0.7064817237 |
| C    | 6.0    | 0.5684965738  | -2.8051661129 | 0.9539981461  |
| N    | 7.0    | -1.5410405242 | 2.3401588232  | -1.8506482213 |
| N    | 7.0    | 1.6247744515  | 2.3258053731  | 1.7107846081  |
| N    | 7.0    | -1.7366211334 | -2.4236062614 | -1.6731773400 |
| N    | 7.0    | 1.4366836178  | -2.4379905592 | 1.8804992029  |
| C    | 6.0    | 0.5773869403  | 4.0930133688  | 0.4010960248  |
| C    | 6.0    | -0.3562115161 | 4.0981113358  | -0.6485838489 |
| C    | 6.0    | 2.7181857951  | 0.6473255148  | 3.0940034485  |
| C    | 6.0    | 2.6657636359  | -0.7556636634 | 3.1426578583  |
| C    | 6.0    | 0.2331597727  | -4.1958443282 | 0.6953652584  |

|   |     |               |               |               |
|---|-----|---------------|---------------|---------------|
| C | 6.0 | -0.7027463836 | -4.1912712917 | -0.3517857967 |
| C | 6.0 | -2.8175649132 | -0.7450852800 | -3.0644298754 |
| C | 6.0 | -2.7629281974 | 0.6573573510  | -3.1149516092 |
| C | 6.0 | 1.1039519089  | 5.2828569646  | 0.9111326987  |
| C | 6.0 | -0.7962543098 | 5.2934483734  | -1.2229735094 |
| C | 6.0 | 0.6653556679  | 6.4766477562  | 0.3389949863  |
| C | 6.0 | -0.2727956452 | 6.4818678094  | -0.7141956496 |
| C | 6.0 | 3.5203203200  | 1.3757005840  | 3.9771080601  |
| C | 6.0 | 3.4145790183  | -1.4781765377 | 4.0758594042  |
| C | 6.0 | 4.2180513704  | -0.7530891875 | 4.9548863969  |
| C | 6.0 | 4.2700965561  | 0.6560916745  | 4.9064083860  |
| C | 6.0 | 0.6692494266  | -5.3900151751 | 1.2741198864  |
| C | 6.0 | -1.2359797917 | -5.3804769121 | -0.8548971637 |
| C | 6.0 | -0.8029511658 | -6.5741112685 | -0.2770859207 |
| C | 6.0 | 0.1374944854  | -6.5787588963 | 0.7734474923  |
| C | 6.0 | -3.5233807279 | 1.3808465590  | -4.0378416444 |
| C | 6.0 | -3.6341622511 | -1.4727553249 | -3.9347266577 |
| C | 6.0 | -4.3394637817 | 0.6566590662  | -4.9058607012 |
| C | 6.0 | -4.3940329569 | -0.7523838794 | -4.8551653742 |
| H | 1.0 | -3.4776437876 | 2.4646639315  | -4.0734860757 |
| H | 1.0 | -4.9449782825 | 1.1846807079  | -5.6370033141 |
| H | 1.0 | -5.0403414249 | -1.2833436458 | -5.5482429119 |
| H | 1.0 | -3.6721878408 | -2.5566122294 | -3.8918720856 |
| H | 1.0 | -1.5184286342 | 5.2932082898  | -2.0332125333 |
| H | 1.0 | -0.5918543107 | 7.4313131462  | -1.1347912793 |
| H | 1.0 | 1.0512366792  | 7.4220853375  | 0.7096686257  |
| H | 1.0 | 1.8251359037  | 5.2739127133  | 1.7222056244  |
| H | 1.0 | 3.5554493233  | 2.4597756496  | 3.9369731014  |
| H | 1.0 | 4.9060909504  | 1.1876548772  | 5.6085435803  |
| H | 1.0 | 4.8151246395  | -1.2804459382 | 5.6934463994  |
| H | 1.0 | 3.3699375090  | -2.5620744517 | 4.1109577785  |
| H | 1.0 | 1.3941063505  | -5.3896199747 | 2.0820226019  |
| H | 1.0 | 0.4524338423  | -7.5275219186 | 1.1987053666  |
| H | 1.0 | -1.1950844187 | -7.5192897710 | -0.6418135279 |
| H | 1.0 | -1.9585569956 | -5.3720224317 | -1.6647873374 |
| O | 8.0 | 1.5021235364  | 1.5056044264  | -3.4250803770 |
| O | 8.0 | -1.2764727858 | 0.0004806976  | 1.2651509005  |
| C | 6.0 | 2.5719763396  | 2.3695272438  | -3.0806005721 |
| H | 1.0 | 3.5120548585  | 1.8264317469  | -2.8908617771 |
| H | 1.0 | 2.7412617637  | 3.0460578537  | -3.9253753577 |
| H | 1.0 | 2.3507804152  | 2.9854106346  | -2.1949122505 |
| C | 6.0 | -2.4348950947 | 0.7052675782  | 1.3921286358  |
| C | 6.0 | -3.6413671067 | 0.1918672869  | 0.8870616252  |
| C | 6.0 | -2.4550164717 | 1.9116005851  | 2.1117851754  |
| C | 6.0 | -4.8384943785 | 0.8835480934  | 1.0831735622  |
| C | 6.0 | -3.6566485855 | 2.5970476831  | 2.3036488504  |
| C | 6.0 | -4.8536926208 | 2.0910427785  | 1.7880973084  |

|   |     |               |               |               |
|---|-----|---------------|---------------|---------------|
| H | 1.0 | -3.6316789362 | -0.7555082964 | 0.3562771155  |
| H | 1.0 | -5.7636710298 | 0.4723024742  | 0.6862127983  |
| H | 1.0 | -5.7872039932 | 2.6263303222  | 1.9395675752  |
| H | 1.0 | -3.6549299072 | 3.5293227734  | 2.8635015265  |
| H | 1.0 | -1.5276605835 | 2.2938596893  | 2.5283796689  |
| O | 8.0 | 1.1940951767  | -0.1693612040 | -1.2178185775 |
| H | 1.0 | 1.3583262944  | 0.8993110601  | -2.6648185803 |
| H | 1.0 | 2.0800483388  | -0.2285112231 | -0.8270245496 |

### 3a. Anion SiPc<sup>-</sup>(OMe)(OPh)--HOH: reactant for OPh displacement

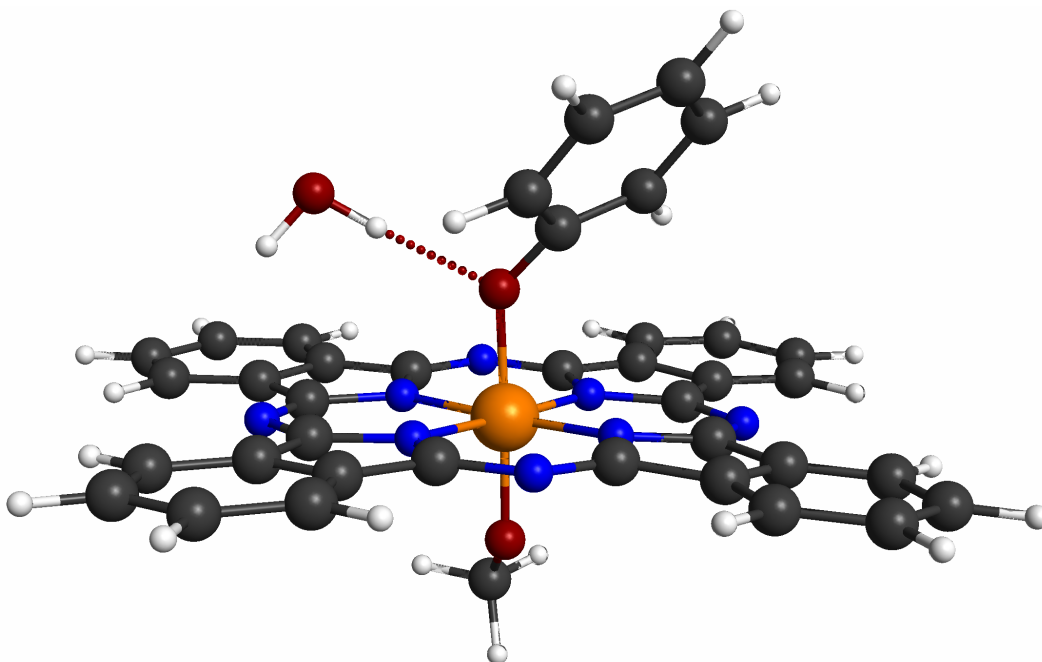

$E = -2453.98745$  hartree

| ATOM | CHARGE | X             | Y             | Z             |
|------|--------|---------------|---------------|---------------|
| SI   | 14.0   | 0.1356540372  | 0.4784290701  | -0.3729226936 |
| N    | 7.0    | 0.3109050880  | 2.3943228531  | -0.5333955066 |
| N    | 7.0    | -0.0912137072 | -1.4255555363 | -0.1592333646 |
| N    | 7.0    | 1.4443358016  | 0.4921305338  | 1.0736357481  |
| N    | 7.0    | -1.2134028522 | 0.4797022913  | -1.7735164781 |
| C    | 6.0    | -1.6037007216 | 1.5718356263  | -2.5278095380 |
| C    | 6.0    | -1.9464142996 | -0.6105059825 | -2.2050490207 |
| C    | 6.0    | 2.1008443987  | 1.5974884034  | 1.5748452891  |
| C    | 6.0    | 1.9016237282  | -0.6152934537 | 1.7651776845  |
| C    | 6.0    | -0.2950473079 | 3.1883836952  | -1.5058347117 |
| C    | 6.0    | 1.1702547917  | 3.2075699219  | 0.1954951534  |
| C    | 6.0    | -0.9981911408 | -2.2294911265 | -0.8449500946 |
| C    | 6.0    | 0.6105716086  | -2.2414219012 | 0.7229768170  |
| N    | 7.0    | -1.1592186624 | 2.8337570970  | -2.4193121332 |
| N    | 7.0    | 1.9782685574  | 2.8707636151  | 1.1671646948  |
| N    | 7.0    | -1.8547396548 | -1.8767577238 | -1.7679567324 |
| N    | 7.0    | 1.5179136743  | -1.8920977289 | 1.6002928785  |
| C    | 6.0    | 1.0859392678  | 4.5766219975  | -0.3058013543 |
| C    | 6.0    | 0.1774366914  | 4.5631016747  | -1.3714060018 |
| C    | 6.0    | 3.0003296774  | 1.1945622503  | 2.6190077904  |
| C    | 6.0    | 2.8751061168  | -0.2103362060 | 2.7380939877  |
| C    | 6.0    | 0.1534384963  | -3.6190124962 | 0.5773988289  |

|   |     |               |               |               |
|---|-----|---------------|---------------|---------------|
| C | 6.0 | -0.8552743706 | -3.6106165110 | -0.3953767871 |
| C | 6.0 | -2.8365135228 | -0.2081935523 | -3.2552623334 |
| C | 6.0 | -2.6149397720 | 1.1748094472  | -3.4638669994 |
| C | 6.0 | 1.7266334632  | 5.7533613433  | 0.0862058467  |
| C | 6.0 | -0.1230315528 | 5.7273580393  | -2.0813527512 |
| C | 6.0 | 1.4281816334  | 6.9205245083  | -0.6201040274 |
| C | 6.0 | 0.5140302540  | 6.9074487219  | -1.6916537533 |
| C | 6.0 | 3.8911403088  | 1.9111153928  | 3.4358577424  |
| C | 6.0 | 3.6377042262  | -0.9233102143 | 3.6795280347  |
| C | 6.0 | 4.5162588815  | -0.2082343182 | 4.4829215080  |
| C | 6.0 | 4.6433227767  | 1.1995809146  | 4.3615617951  |
| C | 6.0 | 0.5384564578  | -4.8025150377 | 1.2115367698  |
| C | 6.0 | -1.5109940431 | -4.7857843911 | -0.7688700695 |
| C | 6.0 | -1.1278302013 | -5.9711229600 | -0.1384930010 |
| C | 6.0 | -0.1147138146 | -5.9792430462 | 0.8405766660  |
| C | 6.0 | -3.3398167844 | 1.8802938364  | -4.4408622084 |
| C | 6.0 | -3.7825654031 | -0.9106965152 | -4.0217499351 |
| C | 6.0 | -4.2739914854 | 1.1798945850  | -5.1917512157 |
| C | 6.0 | -4.4939429011 | -0.2069193257 | -4.9840656264 |
| H | 1.0 | -3.1694596870 | 2.9414086025  | -4.5986589363 |
| H | 1.0 | -4.8488462643 | 1.6988111329  | -5.9544916104 |
| H | 1.0 | -5.2334094184 | -0.7229314365 | -5.5909794702 |
| H | 1.0 | -3.9486359697 | -1.9719552660 | -3.8600697465 |
| H | 1.0 | -0.8273788648 | 5.7119554337  | -2.9076273875 |
| H | 1.0 | 0.3030763779  | 7.8320733313  | -2.2223731130 |
| H | 1.0 | 1.9080680779  | 7.8549223119  | -0.3414114466 |
| H | 1.0 | 2.4314682227  | 5.7557470449  | 0.9121672748  |
| H | 1.0 | 3.9856651822  | 2.9890273285  | 3.3402386175  |
| H | 1.0 | 5.3415357297  | 1.7265385509  | 5.0067303382  |
| H | 1.0 | 5.1196173164  | -0.7330734534 | 5.2191593210  |
| H | 1.0 | 3.5396330070  | -2.0012905831 | 3.7707519983  |
| H | 1.0 | 1.3193473240  | -4.8026557667 | 1.9659524348  |
| H | 1.0 | 0.1608057500  | -6.9182230793 | 1.3132632593  |
| H | 1.0 | -1.6173949665 | -6.9039652338 | -0.4052162032 |
| H | 1.0 | -2.2914161683 | -4.7732318214 | -1.5236498183 |
| O | 8.0 | 1.4427663645  | 0.3153382430  | -1.5140495067 |
| O | 8.0 | -1.1733255095 | 0.6201397368  | 0.8738389517  |
| C | 6.0 | 1.5382691386  | -0.6404209348 | -2.5448382430 |
| H | 1.0 | 2.4608415284  | -0.4485750123 | -3.1078029961 |
| H | 1.0 | 1.5858370201  | -1.6712327393 | -2.1630512578 |
| H | 1.0 | 0.6968037018  | -0.5808215714 | -3.2515982868 |
| C | 6.0 | -1.7714721260 | 1.7306013527  | 1.3932404787  |
| C | 6.0 | -2.8713119266 | 2.3300882670  | 0.7572495905  |
| C | 6.0 | -1.3455031169 | 2.2337787122  | 2.6346425851  |
| C | 6.0 | -3.5160269769 | 3.4204915452  | 1.3469172564  |
| C | 6.0 | -1.9963777792 | 3.3220029949  | 3.2177159449  |
| C | 6.0 | -3.0833327692 | 3.9252948558  | 2.5771209461  |

|   |     |               |               |               |
|---|-----|---------------|---------------|---------------|
| H | 1.0 | -3.2179126538 | 1.9287972146  | -0.1899934314 |
| H | 1.0 | -4.3662408144 | 3.8745348483  | 0.8426031864  |
| H | 1.0 | -3.5890772598 | 4.7721822732  | 3.0335574415  |
| H | 1.0 | -1.6534963650 | 3.6968922220  | 4.1795917571  |
| H | 1.0 | -0.5189353867 | 1.7443399941  | 3.1397020019  |
| O | 8.0 | -1.1638213239 | -1.1075138212 | 3.1798572575  |
| H | 1.0 | -1.1660098582 | -0.5624936284 | 2.3652546984  |
| H | 1.0 | -0.3083285026 | -1.5623713438 | 3.1373337089  |



### 3b. Anion SiPc<sup>-</sup>(OMe)(PhO-H-OH): transition state for OPh displacement

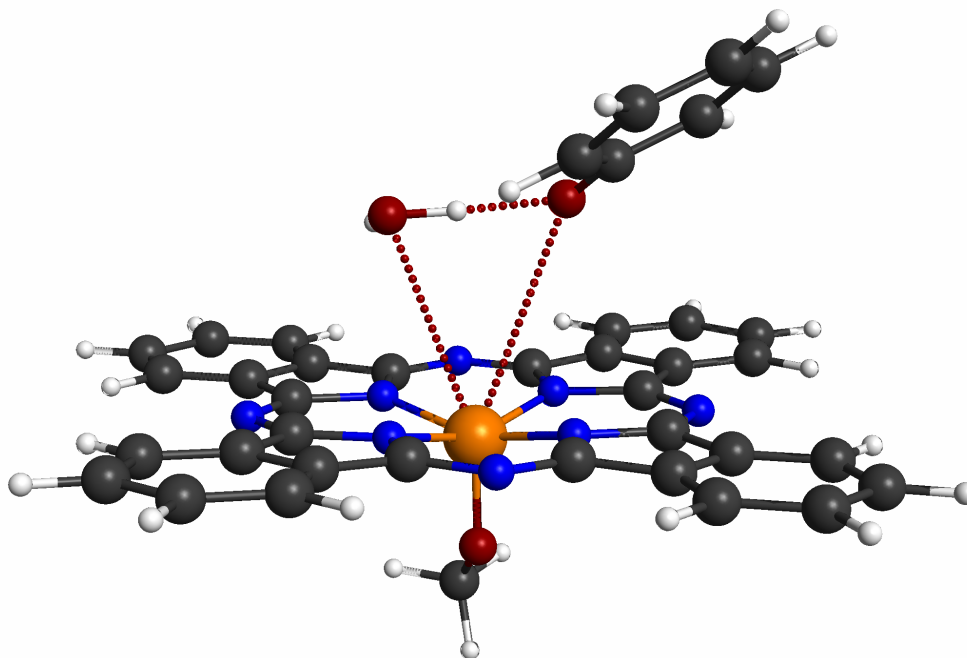

$E = -2453.94127$  hartree

| ATOM | CHARGE | X             | Y             | Z             |
|------|--------|---------------|---------------|---------------|
| SI   | 14.0   | 0.5377896244  | 0.2473408006  | -0.6442793989 |
| N    | 7.0    | 0.4507574962  | 2.1438346737  | -0.5422966779 |
| N    | 7.0    | 0.1381647026  | -1.5856277860 | -0.2723497117 |
| N    | 7.0    | 1.5989728840  | 0.2792261879  | 0.9562431729  |
| N    | 7.0    | -1.0381369658 | 0.2845008296  | -1.7431245737 |
| C    | 6.0    | -1.5570356368 | 1.3996157950  | -2.4077154540 |
| C    | 6.0    | -1.7687901283 | -0.8087029535 | -2.2196064407 |
| C    | 6.0    | 2.2422429981  | 1.3838572762  | 1.5133502177  |
| C    | 6.0    | 2.0672053644  | -0.8281752740 | 1.6712715678  |
| C    | 6.0    | -0.2556434254 | 2.9921209198  | -1.4177794540 |
| C    | 6.0    | 1.2915483765  | 2.9885306106  | 0.2004896560  |
| C    | 6.0    | -0.7462163108 | -2.4275655483 | -0.9766640950 |
| C    | 6.0    | 0.8393175463  | -2.4361573953 | 0.6112974502  |
| N    | 7.0    | -1.1647371640 | 2.6658416545  | -2.2833524300 |
| N    | 7.0    | 2.1205970764  | 2.6590301828  | 1.1450605273  |
| N    | 7.0    | -1.6212467304 | -2.0875366505 | -1.8749807782 |
| N    | 7.0    | 1.7330421505  | -2.1033549085 | 1.4914598939  |
| C    | 6.0    | 1.1303379531  | 4.3677142083  | -0.2263600751 |
| C    | 6.0    | 0.1684188531  | 4.3690435778  | -1.2368878366 |
| C    | 6.0    | 3.1082401791  | 0.9804429508  | 2.5733720246  |
| C    | 6.0    | 2.9984687073  | -0.4212724967 | 2.6714428555  |
| C    | 6.0    | 0.4064671206  | -3.8093973821 | 0.4375899282  |

|   |     |               |               |               |
|---|-----|---------------|---------------|---------------|
| C | 6.0 | -0.5820217208 | -3.8042658987 | -0.5488288499 |
| C | 6.0 | -2.7403434704 | -0.3853121488 | -3.1731454381 |
| C | 6.0 | -2.6026015448 | 1.0124768459  | -3.2954846187 |
| C | 6.0 | 1.7465597236  | 5.5481547655  | 0.1964968121  |
| C | 6.0 | -0.2213932812 | 5.5526344937  | -1.8693210905 |
| C | 6.0 | 1.3649772317  | 6.7329512332  | -0.4337376027 |
| C | 6.0 | 0.3922223510  | 6.7349135353  | -1.4544693424 |
| C | 6.0 | 3.9622253279  | 1.7046261073  | 3.4258713076  |
| C | 6.0 | 3.7404304827  | -1.1408571934 | 3.6274794001  |
| C | 6.0 | 4.5830750377  | -0.4231400464 | 4.4619108854  |
| C | 6.0 | 4.6943206016  | 0.9904401536  | 4.3616983022  |
| C | 6.0 | 0.7969214123  | -4.9940278367 | 1.0701631072  |
| C | 6.0 | -1.2228558230 | -4.9818372675 | -0.9458842362 |
| C | 6.0 | -0.8337148998 | -6.1664775301 | -0.3220123199 |
| C | 6.0 | 0.1649558691  | -6.1721669426 | 0.6745978619  |
| C | 6.0 | -3.4205100275 | 1.7473220358  | -4.1753822309 |
| C | 6.0 | -3.7000586824 | -1.0895709317 | -3.9249248396 |
| C | 6.0 | -4.3602477421 | 1.0483862450  | -4.9161324021 |
| C | 6.0 | -4.4998505195 | -0.3612519171 | -4.7912570716 |
| H | 1.0 | -3.3118511246 | 2.8237794565  | -4.2664047878 |
| H | 1.0 | -5.0065459485 | 1.5834228069  | -5.6067325772 |
| H | 1.0 | -5.2503686332 | -0.8721908828 | -5.3883569437 |
| H | 1.0 | -3.8035025421 | -2.1658438437 | -3.8256460720 |
| H | 1.0 | -0.9715282133 | 5.5474400260  | -2.6537997930 |
| H | 1.0 | 0.1182183209  | 7.6752744051  | -1.9248391452 |
| H | 1.0 | 1.8238080711  | 7.6715919845  | -0.1354745664 |
| H | 1.0 | 2.4941274969  | 5.5383567386  | 0.9833963177  |
| H | 1.0 | 4.0425255617  | 2.7844483318  | 3.3457548564  |
| H | 1.0 | 5.3662451870  | 1.5162088131  | 5.0346864050  |
| H | 1.0 | 5.1727946594  | -0.9469084616 | 5.2095223245  |
| H | 1.0 | 3.6526457970  | -2.2205115697 | 3.7017561343  |
| H | 1.0 | 1.5632878512  | -4.9911959156 | 1.8387623000  |
| H | 1.0 | 0.4431856943  | -7.1130288637 | 1.1414204865  |
| H | 1.0 | -1.3068467230 | -7.1027635876 | -0.6048555129 |
| H | 1.0 | -1.9926090179 | -4.9688286761 | -1.7110143370 |
| O | 8.0 | 1.7610321186  | 0.1477954642  | -1.7837611355 |
| O | 8.0 | -2.6479814822 | 1.5111639517  | 1.0089862032  |
| C | 6.0 | 1.8768835315  | -0.8591965368 | -2.7858071142 |
| H | 1.0 | 2.7481317007  | -0.6147900432 | -3.4001398191 |
| H | 1.0 | 2.0265362894  | -1.8522962385 | -2.3451747398 |
| H | 1.0 | 0.9909123903  | -0.8851230764 | -3.4323259140 |
| C | 6.0 | -2.8414768402 | 2.6431345090  | 1.6135401880  |
| C | 6.0 | -3.9151212246 | 3.5187367199  | 1.2448688974  |
| C | 6.0 | -2.0222274340 | 3.1037961335  | 2.6961595560  |
| C | 6.0 | -4.1441055699 | 4.7282023343  | 1.8966828601  |
| C | 6.0 | -2.2649942572 | 4.3143725142  | 3.3415058939  |
| C | 6.0 | -3.3258752484 | 5.1476267849  | 2.9561256546  |

|   |     |               |               |              |
|---|-----|---------------|---------------|--------------|
| H | 1.0 | -4.5598960112 | 3.2019305897  | 0.4262343548 |
| H | 1.0 | -4.9766867344 | 5.3559433272  | 1.5777290739 |
| H | 1.0 | -3.5091970305 | 6.0911957957  | 3.4647432199 |
| H | 1.0 | -1.6143570397 | 4.6191065223  | 4.1618706592 |
| H | 1.0 | -1.1898712521 | 2.4739295379  | 3.0053445030 |
| O | 8.0 | -1.3316444597 | -0.3487944219 | 2.3490123993 |
| H | 1.0 | -1.7893252298 | 0.4010519020  | 1.8503309556 |
| H | 1.0 | -1.5965746210 | -1.1392112360 | 1.8550909823 |

### 3c. Anion SiPc<sup>-</sup>(OMe)(OH)--HOPh: product for OPh displacement

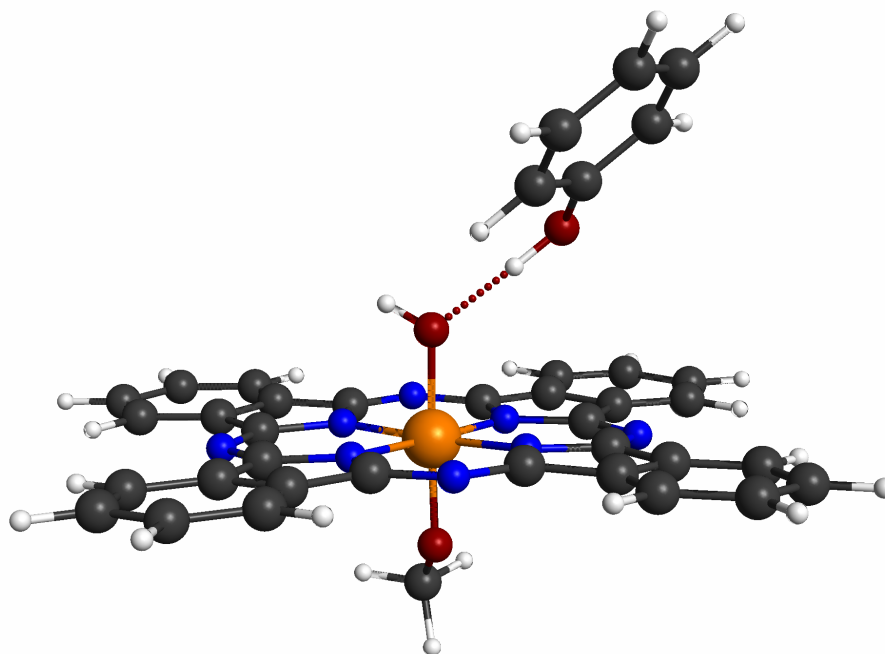

$E = -2453.99889$  hartree

COORDINATES OF ALL ATOMS ARE (ANGS)

| ATOM | CHARGE | X             | Y             | Z             |
|------|--------|---------------|---------------|---------------|
| SI   | 14.0   | 0.3174921202  | 0.2385279899  | -0.3748943496 |
| N    | 7.0    | 0.4469792894  | 2.1511438524  | -0.4985137214 |
| N    | 7.0    | 0.1139409700  | -1.6869836475 | -0.1797068251 |
| N    | 7.0    | 1.6592233910  | 0.2308508774  | 1.0427624341  |
| N    | 7.0    | -1.0533643969 | 0.2250709134  | -1.7652077073 |
| C    | 6.0    | -1.4953981806 | 1.3280754659  | -2.4706745680 |
| C    | 6.0    | -1.7622441740 | -0.8731711289 | -2.2134749628 |
| C    | 6.0    | 2.2983669836  | 1.3390573066  | 1.5561717096  |
| C    | 6.0    | 2.1614111947  | -0.8838835845 | 1.6900845367  |
| C    | 6.0    | -0.2204699187 | 2.9554838278  | -1.4180506936 |
| C    | 6.0    | 1.2825658498  | 2.9661704779  | 0.2526885308  |
| C    | 6.0    | -0.7736310414 | -2.4987960114 | -0.8843067258 |
| C    | 6.0    | 0.8589095512  | -2.5097949186 | 0.6667247466  |
| N    | 7.0    | -1.0929128276 | 2.6006987614  | -2.3245424783 |
| N    | 7.0    | 2.1217030939  | 2.6215856685  | 1.1962552446  |
| N    | 7.0    | -1.6371810197 | -2.1464932131 | -1.8019364056 |
| N    | 7.0    | 1.7950686289  | -2.1632117605 | 1.5114273885  |
| C    | 6.0    | 1.1303447037  | 4.3507832782  | -0.1890899094 |
| C    | 6.0    | 0.1979519871  | 4.3428115622  | -1.2349413228 |
| C    | 6.0    | 3.2418986629  | 0.9312461086  | 2.5599294140  |
| C    | 6.0    | 3.1564482160  | -0.4797124377 | 2.6422450965  |

|   |     |               |               |               |
|---|-----|---------------|---------------|---------------|
| C | 6.0 | 0.4237918399  | -3.8920879685 | 0.4984940567  |
| C | 6.0 | -0.5977653958 | -3.8847223232 | -0.4618436257 |
| C | 6.0 | -2.6826691238 | -0.4673874593 | -3.2371862801 |
| C | 6.0 | -2.5090505712 | 0.9282748304  | -3.4042273775 |
| C | 6.0 | 1.7320024089  | 5.5365953621  | 0.2360049017  |
| C | 6.0 | -0.1658816198 | 5.5216214308  | -1.8888110594 |
| C | 6.0 | 1.3704467030  | 6.7181256075  | -0.4150526537 |
| C | 6.0 | 0.4320999152  | 6.7105699712  | -1.4653562939 |
| C | 6.0 | 4.1376757666  | 1.6472616844  | 3.3716222994  |
| C | 6.0 | 3.9627802281  | -1.1977519110 | 3.5420740193  |
| C | 6.0 | 4.8460083362  | -0.4829022826 | 4.3408945242  |
| C | 6.0 | 4.9335274555  | 0.9304704524  | 4.2562600099  |
| C | 6.0 | 0.8384507365  | -5.0809616523 | 1.1040064059  |
| C | 6.0 | -1.2358437224 | -5.0653059149 | -0.8495974904 |
| C | 6.0 | -0.8233197950 | -6.2549575571 | -0.2469093773 |
| C | 6.0 | 0.2024862521  | -6.2624419728 | 0.7191063260  |
| C | 6.0 | -3.2774427497 | 1.6414188364  | -4.3407720739 |
| C | 6.0 | -3.6240602988 | -1.1734357901 | -4.0057916421 |
| C | 6.0 | -4.2061663410 | 0.9369743314  | -5.0954941130 |
| C | 6.0 | -4.3785884287 | -0.4616898677 | -4.9291410261 |
| H | 1.0 | -3.1448748068 | 2.7123930469  | -4.4654503930 |
| H | 1.0 | -4.8142107485 | 1.4626287115  | -5.8273045211 |
| H | 1.0 | -5.1157287300 | -0.9809586908 | -5.5362032666 |
| H | 1.0 | -3.7553602967 | -2.2438231769 | -3.8747930162 |
| H | 1.0 | -0.8886954779 | 5.5099980288  | -2.6990554590 |
| H | 1.0 | 0.1715723527  | 7.6462139511  | -1.9530619296 |
| H | 1.0 | 1.8195531759  | 7.6593452471  | -0.1092048353 |
| H | 1.0 | 2.4562146612  | 5.5352852251  | 1.0450619562  |
| H | 1.0 | 4.2020917328  | 2.7296215109  | 3.3046226236  |
| H | 1.0 | 5.6365233000  | 1.4576571299  | 4.8960865950  |
| H | 1.0 | 5.4834571696  | -1.0123365362 | 5.0444417455  |
| H | 1.0 | 3.8947139743  | -2.2801282615 | 3.6051375343  |
| H | 1.0 | 1.6291422606  | -5.0809146072 | 1.8481780651  |
| H | 1.0 | 0.5011312454  | -7.2048583183 | 1.1705388490  |
| H | 1.0 | -1.2994251479 | -7.1914943813 | -0.5249294347 |
| H | 1.0 | -2.0258077710 | -5.0530903289 | -1.5944638733 |
| O | 8.0 | 1.6032920600  | 0.1059852451  | -1.5432768316 |
| O | 8.0 | -3.1084515451 | 2.0474661423  | 0.6147526810  |
| C | 6.0 | 1.6968656539  | -0.8423628350 | -2.5802958404 |
| H | 1.0 | 2.5975711152  | -0.6225368769 | -3.1679733005 |
| H | 1.0 | 1.7851573677  | -1.8730552746 | -2.2049090178 |
| H | 1.0 | 0.8347171412  | -0.8051915900 | -3.2629527012 |
| C | 6.0 | -3.1850495803 | 3.0039961877  | 1.5719639765  |
| C | 6.0 | -4.2844058784 | 3.8790822804  | 1.5377200439  |
| C | 6.0 | -2.2225076177 | 3.1472444944  | 2.5869502238  |
| C | 6.0 | -4.4155240706 | 4.8791850005  | 2.5009812997  |
| C | 6.0 | -2.3669781308 | 4.1528794313  | 3.5456273057  |

|   |     |               |               |              |
|---|-----|---------------|---------------|--------------|
| C | 6.0 | -3.4598582730 | 5.0249430637  | 3.5130758237 |
| H | 1.0 | -5.0219211410 | 3.7599633827  | 0.7483404903 |
| H | 1.0 | -5.2711190569 | 5.5495401010  | 2.4599588893 |
| H | 1.0 | -3.5652061553 | 5.8057437086  | 4.2614284879 |
| H | 1.0 | -1.6153278055 | 4.2539295404  | 4.3255137392 |
| H | 1.0 | -1.3734606798 | 2.4700612559  | 2.6102941584 |
| O | 8.0 | -0.9503740175 | 0.4878821885  | 0.8535828213 |
| H | 1.0 | -2.2759206752 | 1.5015912172  | 0.7124857516 |
| H | 1.0 | -1.2438826595 | -0.3581205929 | 1.2256023959 |

4a. Anion SiPc<sup>-</sup>(OPh)(OMe)--HOH: reactant for OMe displacement

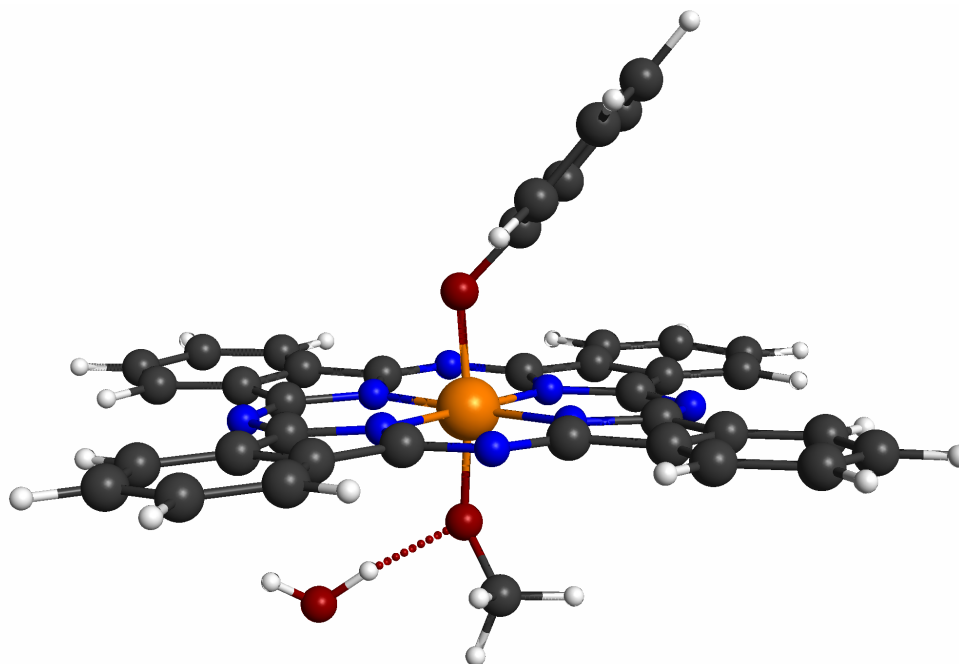

$E = -2453.98921 \text{ hartree}$

| ATOM | CHARGE | X             | Y             | Z             |
|------|--------|---------------|---------------|---------------|
| SI   | 14.0   | -0.0934330973 | 0.0604562356  | -0.1245496674 |
| N    | 7.0    | -0.1044250706 | 1.9886321750  | -0.1432781943 |
| N    | 7.0    | -0.1068966464 | -1.8667876322 | -0.0823078043 |
| N    | 7.0    | 1.1892831411  | 0.0881481494  | 1.3448066924  |
| N    | 7.0    | -1.3815383667 | 0.0468878862  | -1.5836976775 |
| C    | 6.0    | -1.8874754675 | 1.1495291073  | -2.2435058572 |
| C    | 6.0    | -1.9632778901 | -1.0777808897 | -2.1410886057 |
| C    | 6.0    | 1.7021211448  | 1.2117076695  | 1.9671718195  |
| C    | 6.0    | 1.7704639759  | -1.0180866560 | 1.9331067082  |
| C    | 6.0    | -0.8160752766 | 2.8012766776  | -1.0249983736 |
| C    | 6.0    | 0.6009832541  | 2.8277567360  | 0.7213822980  |
| C    | 6.0    | -0.8977638312 | -2.6965982518 | -0.8694458939 |
| C    | 6.0    | 0.6597616919  | -2.6739434711 | 0.7459563580  |
| N    | 7.0    | -1.6152680397 | 2.4402149746  | -1.9939415370 |
| N    | 7.0    | 1.4181606357  | 2.4942759187  | 1.6853380701  |
| N    | 7.0    | -1.7480759073 | -2.3585553211 | -1.8035164643 |
| N    | 7.0    | 1.5330887724  | -2.3107157483 | 1.6517812504  |
| C    | 6.0    | 0.3243625562  | 4.2180205711  | 0.3790163699  |
| C    | 6.0    | -0.5523128728 | 4.2015910777  | -0.7131938540 |
| C    | 6.0    | 2.6360073710  | 0.8180965270  | 2.9823347859  |
| C    | 6.0    | 2.6822151690  | -0.5968985047 | 2.9580182632  |
| C    | 6.0    | 0.3461220638  | -4.0758472273 | 0.4820636347  |

|   |     |               |               |               |
|---|-----|---------------|---------------|---------------|
| C | 6.0 | -0.6330629378 | -4.0891894002 | -0.5197045362 |
| C | 6.0 | -2.8627703874 | -0.6863460176 | -3.1884099259 |
| C | 6.0 | -2.8116515351 | 0.7266706065  | -3.2559164282 |
| C | 6.0 | 0.7762218205  | 5.4207925897  | 0.9271391820  |
| C | 6.0 | -1.0105730045 | 5.3870283490  | -1.2926566895 |
| C | 6.0 | 0.3212775972  | 6.6077988394  | 0.3503316347  |
| C | 6.0 | -0.5625942497 | 6.5912215117  | -0.7469453609 |
| C | 6.0 | 3.4291939353  | 1.5484910031  | 3.8845956895  |
| C | 6.0 | 3.5166425032  | -1.3060717300 | 3.8389895337  |
| C | 6.0 | 4.2968950634  | -0.5775637637 | 4.7270809765  |
| C | 6.0 | 4.2536851654  | 0.8406391459  | 4.7489973708  |
| C | 6.0 | 0.8287017428  | -5.2612698603 | 1.0396250867  |
| C | 6.0 | -1.1615783919 | -5.2892481262 | -0.9993464905 |
| C | 6.0 | -0.6815877527 | -6.4776034390 | -0.4445749939 |
| C | 6.0 | 0.3027104789  | -6.4639356685 | 0.5627884246  |
| C | 6.0 | -3.5943803693 | 1.4328669881  | -4.1854398570 |
| C | 6.0 | -3.6939145219 | -1.4186680274 | -4.0540474883 |
| C | 6.0 | -4.4150404262 | 0.7026996635  | -5.0349495914 |
| C | 6.0 | -4.4641398055 | -0.7139647944 | -4.9696113160 |
| H | 1.0 | -3.5549915355 | 2.5173864102  | -4.2327580984 |
| H | 1.0 | -5.0318547073 | 1.2211085368  | -5.7645313618 |
| H | 1.0 | -5.1178758957 | -1.2531510860 | -5.6503950885 |
| H | 1.0 | -3.7306730210 | -2.5030450423 | -4.0016106500 |
| H | 1.0 | -1.6908278414 | 5.3675731821  | -2.1387459251 |
| H | 1.0 | -0.8988001954 | 7.5324774088  | -1.1735992982 |
| H | 1.0 | 0.6527474628  | 7.5616972885  | 0.7518958781  |
| H | 1.0 | 1.4575145924  | 5.4276198515  | 1.7725942566  |
| H | 1.0 | 3.3946340479  | 2.6341084035  | 3.9001188590  |
| H | 1.0 | 4.8786192098  | 1.3786265650  | 5.4572201137  |
| H | 1.0 | 4.9534137566  | -1.0984924006 | 5.4192344808  |
| H | 1.0 | 3.5479040650  | -2.3917208564 | 3.8193111704  |
| H | 1.0 | 1.5868936141  | -5.2442252570 | 1.8166736525  |
| H | 1.0 | 0.6560720308  | -7.4055475627 | 0.9745680859  |
| H | 1.0 | -1.0722446858 | -7.4296597409 | -0.7939512677 |
| H | 1.0 | -1.9202896806 | -5.2939807824 | -1.7760777199 |
| O | 8.0 | 1.2309282446  | -0.0756578308 | -1.2847988419 |
| O | 8.0 | -1.4149262186 | -0.0376674725 | 1.0660942223  |
| C | 6.0 | 2.1704330239  | 0.9378255719  | -1.5922099102 |
| H | 1.0 | 2.9662717147  | 0.4876759146  | -2.1972326335 |
| H | 1.0 | 1.7200842195  | 1.7559488901  | -2.1704910121 |
| H | 1.0 | 2.6347976801  | 1.3635379232  | -0.6920220356 |
| C | 6.0 | -2.4196819742 | 0.8117365183  | 1.3876978841  |
| C | 6.0 | -3.6965982521 | 0.6434358310  | 0.8210671529  |
| C | 6.0 | -2.2393091668 | 1.8101329353  | 2.3623552633  |
| C | 6.0 | -4.7602558565 | 1.4573024842  | 1.2166621036  |
| C | 6.0 | -3.3072953052 | 2.6215773071  | 2.7504968814  |
| C | 6.0 | -4.5737585559 | 2.4529208684  | 2.1811326873  |



|   |     |               |               |               |
|---|-----|---------------|---------------|---------------|
| H | 1.0 | -3.8418150351 | -0.1389093949 | 0.0816370298  |
| H | 1.0 | -5.7411557510 | 1.3096601832  | 0.7698186212  |
| H | 1.0 | -5.4038373534 | 3.0840414451  | 2.4879049968  |
| H | 1.0 | -3.1487590184 | 3.3878619615  | 3.5063608659  |
| H | 1.0 | -1.2584284532 | 1.9312419975  | 2.8124128397  |
| O | 8.0 | 2.9504883426  | -2.2687706421 | -1.4913297871 |
| H | 1.0 | 2.2643256606  | -1.5657446597 | -1.4341398596 |
| H | 1.0 | 3.1072965439  | -2.4957435123 | -0.5619137944 |

#### 4b. Anion SiPc<sup>-</sup>(OPh)(MeO-H-OH): transition state for OMe displacement

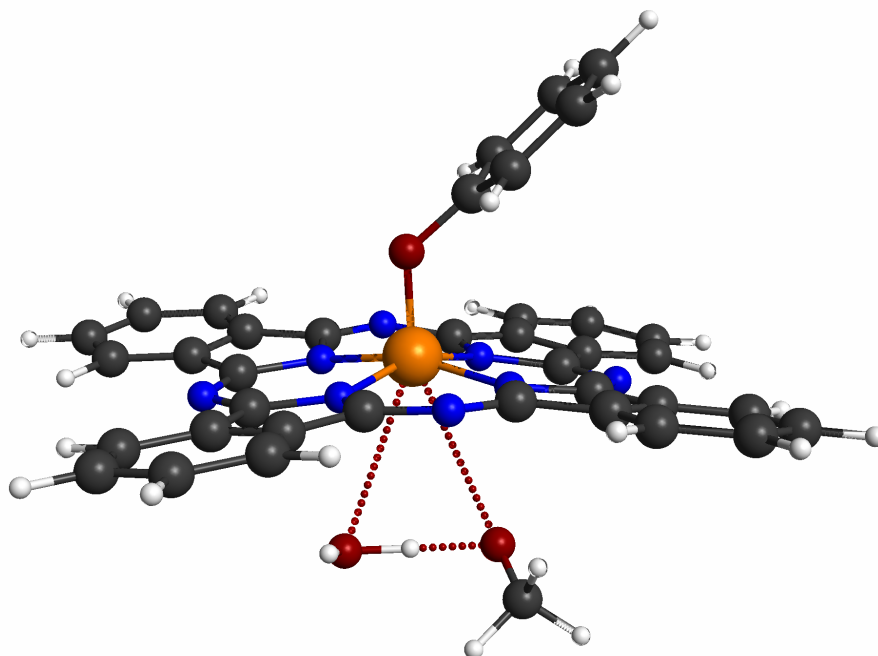

$E = -2453.91200$  hartree

| ATOM | CHARGE | X             | Y             | Z             |
|------|--------|---------------|---------------|---------------|
| SI   | 14.0   | -0.3225419297 | -0.0248651609 | 0.1855568426  |
| N    | 7.0    | -0.0818419772 | 1.8455622681  | -0.0370359282 |
| N    | 7.0    | -0.1693124135 | -1.9103307238 | 0.0505975598  |
| N    | 7.0    | 1.1865629456  | -0.0298635014 | 1.3557084749  |
| N    | 7.0    | -1.3602175252 | -0.0387107323 | -1.4127551666 |
| C    | 6.0    | -1.7682870251 | 1.0586278890  | -2.1733195029 |
| C    | 6.0    | -2.0148344887 | -1.1479256098 | -1.9594681967 |
| C    | 6.0    | 1.7183919154  | 1.0843499318  | 2.0132700570  |
| C    | 6.0    | 1.8449291105  | -1.1417322979 | 1.8932554998  |
| C    | 6.0    | -0.6972926578 | 2.6815399828  | -0.9839246656 |
| C    | 6.0    | 0.6248319196  | 2.6980549421  | 0.8222057036  |
| C    | 6.0    | -1.0348826677 | -2.7554496138 | -0.6652342204 |
| C    | 6.0    | 0.6624318894  | -2.7586247739 | 0.7974826184  |
| N    | 7.0    | -1.4729219421 | 2.3398144374  | -1.9659546292 |
| N    | 7.0    | 1.4223471143  | 2.3663937892  | 1.7960370862  |
| N    | 7.0    | -1.9048458828 | -2.4188568389 | -1.5714281654 |
| N    | 7.0    | 1.6014735362  | -2.4247091809 | 1.6314901589  |
| C    | 6.0    | 0.4067372309  | 4.0863864796  | 0.4479169796  |
| C    | 6.0    | -0.3967366357 | 4.0735091236  | -0.6937929972 |
| C    | 6.0    | 2.7088980423  | 0.6778390022  | 2.9545669931  |
| C    | 6.0    | 2.7990123799  | -0.7277829725 | 2.8682804721  |
| C    | 6.0    | 0.3006464069  | -4.1462765379 | 0.5656145600  |

|   |     |               |               |               |
|---|-----|---------------|---------------|---------------|
| C | 6.0 | -0.7744228509 | -4.1430299423 | -0.3263936245 |
| C | 6.0 | -2.8209387531 | -0.7524118571 | -3.0665906511 |
| C | 6.0 | -2.6553413459 | 0.6413948683  | -3.2094438379 |
| C | 6.0 | 0.8711283978  | 5.2822692759  | 0.9996934881  |
| C | 6.0 | -0.7717999119 | 5.2579445758  | -1.3319504272 |
| C | 6.0 | 0.4964099988  | 6.4695522239  | 0.3686641331  |
| C | 6.0 | -0.3136827226 | 6.4574479905  | -0.7845727761 |
| C | 6.0 | 3.5225103789  | 1.4031576422  | 3.8464256203  |
| C | 6.0 | 3.6980287281  | -1.4476012180 | 3.6788190282  |
| C | 6.0 | 4.4923737711  | -0.7282573234 | 4.5571884948  |
| C | 6.0 | 4.4055221466  | 0.6888555090  | 4.6401910013  |
| C | 6.0 | 0.8172272263  | -5.3399294123 | 1.0774863899  |
| C | 6.0 | -1.3735790667 | -5.3326375715 | -0.7499909746 |
| C | 6.0 | -0.8643973762 | -6.5265304119 | -0.2392329007 |
| C | 6.0 | 0.2186716060  | -6.5300872130 | 0.6639898953  |
| C | 6.0 | -3.3250254352 | 1.3504069112  | -4.2250798178 |
| C | 6.0 | -3.6549119595 | -1.4773028209 | -3.9395571913 |
| C | 6.0 | -4.1469027961 | 0.6320522365  | -5.0789426310 |
| C | 6.0 | -4.3108374900 | -0.7731403858 | -4.9367646363 |
| H | 1.0 | -3.1959364847 | 2.4233314313  | -4.3307563434 |
| H | 1.0 | -4.6783857406 | 1.1468833804  | -5.8749262121 |
| H | 1.0 | -4.9637837862 | -1.3001039954 | -5.6274816200 |
| H | 1.0 | -3.7769783120 | -2.5504821880 | -3.8283812462 |
| H | 1.0 | -1.3935524570 | 5.2419808308  | -2.2217342791 |
| H | 1.0 | -0.5844297867 | 7.3995024545  | -1.2534383325 |
| H | 1.0 | 0.8356659146  | 7.4206919601  | 0.7697783204  |
| H | 1.0 | 1.4985429343  | 5.2844040888  | 1.8856209162  |
| H | 1.0 | 3.4526107480  | 2.4850164833  | 3.9066816446  |
| H | 1.0 | 5.0457465558  | 1.2168400644  | 5.3417651594  |
| H | 1.0 | 5.1965631092  | -1.2524515308 | 5.1976897656  |
| H | 1.0 | 3.7606481282  | -2.5295801542 | 3.6126453145  |
| H | 1.0 | 1.6515390124  | -5.3359327201 | 1.7719249744  |
| H | 1.0 | 0.5906551926  | -7.4779994082 | 1.0430860058  |
| H | 1.0 | -1.3079380427 | -7.4715882881 | -0.5404497409 |
| H | 1.0 | -2.2058717595 | -5.3230538405 | -1.4468204902 |
| O | 8.0 | 1.4999401974  | 1.0344373616  | -2.4664700159 |
| O | 8.0 | -1.5388582102 | -0.0305877409 | 1.3747779632  |
| C | 6.0 | 2.4424253513  | 2.0158490399  | -2.2804645748 |
| H | 1.0 | 3.4791672289  | 1.6250272833  | -2.1248161121 |
| H | 1.0 | 2.5293357225  | 2.7239617153  | -3.1414933804 |
| H | 1.0 | 2.2536057043  | 2.6708271649  | -1.3955611093 |
| C | 6.0 | -2.6378351949 | 0.7886711530  | 1.4842886696  |
| C | 6.0 | -3.8486641541 | 0.4110808421  | 0.8892494656  |
| C | 6.0 | -2.5717092585 | 1.9599945825  | 2.2500326546  |
| C | 6.0 | -4.9820894530 | 1.2110343899  | 1.0490507795  |
| C | 6.0 | -3.7106739441 | 2.7542865387  | 2.4031805734  |
| C | 6.0 | -4.9186620702 | 2.3869840420  | 1.8027773288  |

|   |     |               |               |               |
|---|-----|---------------|---------------|---------------|
| H | 1.0 | -3.8927602876 | -0.5086990056 | 0.3138049176  |
| H | 1.0 | -5.9174631896 | 0.9113404923  | 0.5829456516  |
| H | 1.0 | -5.8022187933 | 3.0076140036  | 1.9246936160  |
| H | 1.0 | -3.6515129564 | 3.6634945205  | 2.9964565294  |
| H | 1.0 | -1.6342793552 | 2.2347482397  | 2.7245157363  |
| O | 8.0 | 2.5009162422  | -1.0021206016 | -1.4338744073 |
| H | 1.0 | 2.0654844117  | -0.1457926763 | -1.9025642611 |

**4c. Anion SiPc<sup>-</sup>(OPh)(OH)--HOMe: product for OMe displacement**

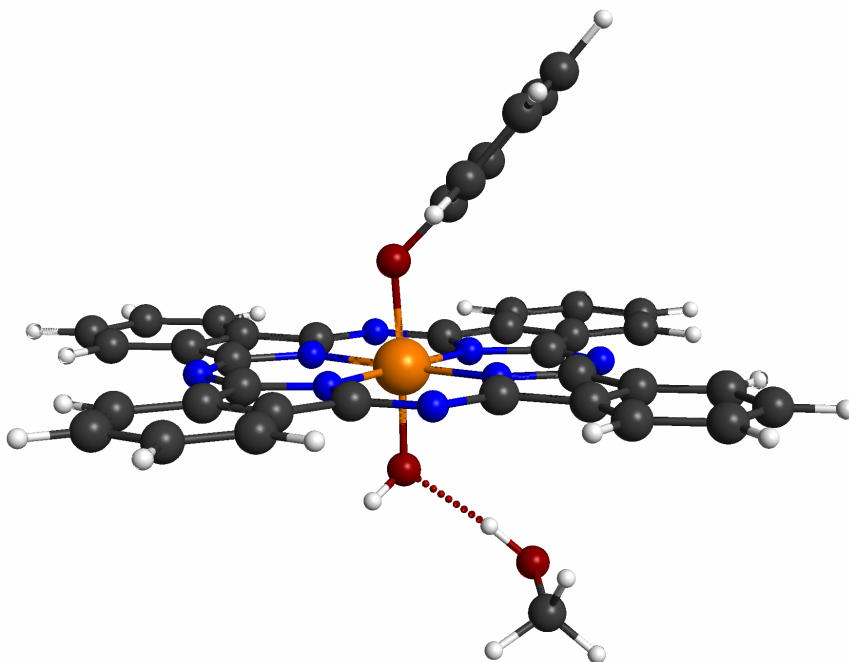

$E = -2453.99218$  hartree

|    |      |               |               |               |
|----|------|---------------|---------------|---------------|
| SI | 14.0 | -0.0862716635 | -0.0830686827 | -0.0344810326 |
| N  | 7.0  | -0.0601819450 | 1.8511346328  | -0.0651149994 |
| N  | 7.0  | -0.1256198421 | -2.0207300169 | 0.0408607007  |
| N  | 7.0  | 1.1897680664  | -0.0706197989 | 1.4459886518  |
| N  | 7.0  | -1.3150364830 | -0.0929752151 | -1.5241517943 |
| C  | 6.0  | -1.8253205165 | 1.0140534003  | -2.1741776710 |
| C  | 6.0  | -1.8900467410 | -1.2184417808 | -2.0942450022 |
| C  | 6.0  | 1.7279898752  | 1.0551788563  | 2.0529786845  |
| C  | 6.0  | 1.6923622219  | -1.1802144627 | 2.1043052310  |
| C  | 6.0  | -0.7433260647 | 2.6635018787  | -0.9633096390 |
| C  | 6.0  | 0.6963296572  | 2.6805906368  | 0.7600253603  |
| C  | 6.0  | -0.8841836694 | -2.8459637919 | -0.7821459035 |
| C  | 6.0  | 0.5815761127  | -2.8307324379 | 0.9155590768  |
| N  | 7.0  | -1.5540557214 | 2.3043666697  | -1.9235320339 |
| N  | 7.0  | 1.5054450471  | 2.3383508252  | 1.7279609399  |
| N  | 7.0  | -1.6880578000 | -2.5001117269 | -1.7540083611 |
| N  | 7.0  | 1.4170305312  | -2.4710338069 | 1.8577326642  |
| C  | 6.0  | 0.4708966419  | 4.0729682124  | 0.3852622047  |
| C  | 6.0  | -0.4273892962 | 4.0627484087  | -0.6896505793 |
| C  | 6.0  | 2.6031629679  | 0.6568317824  | 3.1147384322  |
| C  | 6.0  | 2.5819727194  | -0.7587773063 | 3.1469266398  |
| C  | 6.0  | 0.2622280575  | -4.2313758620 | 0.6465211590  |
| C  | 6.0  | -0.6552048442 | -4.2399946581 | -0.4126904617 |
| C  | 6.0  | -2.7805997746 | -0.8205543682 | -3.1448235653 |

|   |     |               |               |               |
|---|-----|---------------|---------------|---------------|
| C | 6.0 | -2.7400758951 | 0.5936934927  | -3.1955388367 |
| C | 6.0 | 0.9775823967  | 5.2705712806  | 0.8945036536  |
| C | 6.0 | -0.8519888444 | 5.2496152757  | -1.2900514814 |
| C | 6.0 | 0.5548948345  | 6.4598626282  | 0.2972341654  |
| C | 6.0 | -0.3498883774 | 6.4497353925  | -0.7823482244 |
| C | 6.0 | 3.3960636517  | 1.3853292128  | 4.0201892020  |
| C | 6.0 | 3.3518388846  | -1.4703633310 | 4.0841442985  |
| C | 6.0 | 4.1340789030  | -0.7441877307 | 4.9712633124  |
| C | 6.0 | 4.1557353611  | 0.6751657783  | 4.9390704702  |
| C | 6.0 | 0.6977554350  | -5.4186797967 | 1.2374845337  |
| C | 6.0 | -1.1689573779 | -5.4370937073 | -0.9153059745 |
| C | 6.0 | -0.7372268843 | -6.6272586541 | -0.3256683763 |
| C | 6.0 | 0.1857355054  | -6.6184581096 | 0.7381102024  |
| C | 6.0 | -3.5200933697 | 1.3049203964  | -4.1238980253 |
| C | 6.0 | -3.6010437229 | -1.5486906237 | -4.0250767388 |
| C | 6.0 | -4.3288087856 | 0.5791163001  | -4.9878030432 |
| C | 6.0 | -4.3684099759 | -0.8390302650 | -4.9384477937 |
| H | 1.0 | -3.4872962238 | 2.3901281176  | -4.1584541351 |
| H | 1.0 | -4.9432268010 | 1.1011357669  | -5.7168235210 |
| H | 1.0 | -5.0128450087 | -1.3748259559 | -5.6307205552 |
| H | 1.0 | -3.6308173520 | -2.6337912249 | -3.9851089959 |
| H | 1.0 | -1.5482451426 | 5.2354326033  | -2.1231511584 |
| H | 1.0 | -0.6598771319 | 7.3922385521  | -1.2258025212 |
| H | 1.0 | 0.9289943211  | 7.4100781256  | 0.6690669113  |
| H | 1.0 | 1.6754237611  | 5.2723204816  | 1.7264099050  |
| H | 1.0 | 3.4109114049  | 2.4711636619  | 3.9943426253  |
| H | 1.0 | 4.7798184000  | 1.2108244371  | 5.6498637871  |
| H | 1.0 | 4.7413849499  | -1.2663033294 | 5.7061855189  |
| H | 1.0 | 3.3322369954  | -2.5562096236 | 4.1063148523  |
| H | 1.0 | 1.4092723330  | -5.4057234831 | 2.0576480506  |
| H | 1.0 | 0.5026828044  | -7.5613727159 | 1.1757446439  |
| H | 1.0 | -1.1182717041 | -7.5769625048 | -0.6917431308 |
| H | 1.0 | -1.8801578904 | -5.4382846137 | -1.7358487213 |
| O | 8.0 | 1.6299692191  | 1.4255093896  | -3.4324831283 |
| O | 8.0 | -1.4245861758 | -0.1503818448 | 1.1313447254  |
| C | 6.0 | 2.6412583483  | 2.3380130977  | -3.0475013566 |
| H | 1.0 | 3.5685977005  | 1.8358115237  | -2.7245161461 |
| H | 1.0 | 2.8855491112  | 2.9575566125  | -3.9180823796 |
| H | 1.0 | 2.3214846180  | 3.0100612372  | -2.2353285285 |
| C | 6.0 | -2.3996222067 | 0.7394827626  | 1.4384335012  |
| C | 6.0 | -3.6744813035 | 0.6140982241  | 0.8573126824  |
| C | 6.0 | -2.1931306188 | 1.7360700137  | 2.4091036574  |
| C | 6.0 | -4.7120156374 | 1.4691324031  | 1.2346648050  |
| C | 6.0 | -3.2349998742 | 2.5888434780  | 2.7791939396  |
| C | 6.0 | -4.5000269462 | 2.4631712301  | 2.1954530911  |
| H | 1.0 | -3.8381844771 | -0.1662683553 | 0.1195681238  |
| H | 1.0 | -5.6921226391 | 1.3555627212  | 0.7763097955  |

|   |     |               |               |               |
|---|-----|---------------|---------------|---------------|
| H | 1.0 | -5.3097550819 | 3.1265264325  | 2.4882632701  |
| H | 1.0 | -3.0573465929 | 3.3543736535  | 3.5315401004  |
| H | 1.0 | -1.2131968142 | 1.8242842192  | 2.8688492725  |
| O | 8.0 | 1.2356683925  | -0.1532819010 | -1.2039012384 |
| H | 1.0 | 1.4201012263  | 0.8718495408  | -2.6439434118 |
| H | 1.0 | 2.0943380716  | -0.1356966131 | -0.7532402032 |

**5. SiPc(OPh)(OMe): isolated neutral species; no H<sub>2</sub>O molecule**

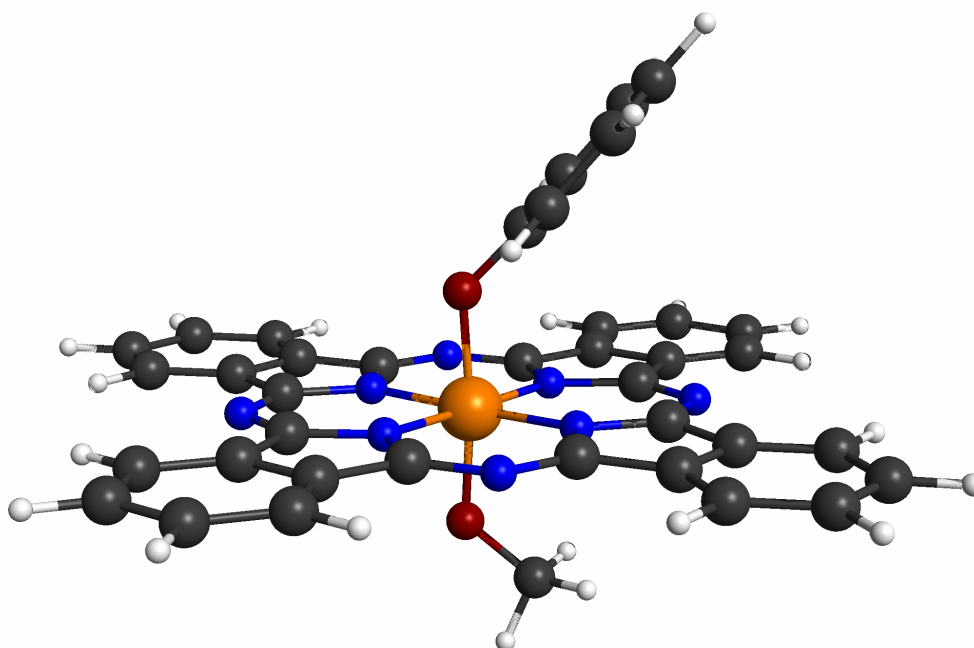

$E = -2377.47880 \text{ hartree}$

| ATOM | CHARGE | X             | Y             | Z             |
|------|--------|---------------|---------------|---------------|
| SI   | 14.0   | -0.0179648652 | 0.0776096813  | -0.2144735456 |
| N    | 7.0    | -0.0376000420 | 2.0159560701  | -0.2407478973 |
| N    | 7.0    | -0.0325966927 | -1.8575430469 | -0.1568832473 |
| N    | 7.0    | 1.2438019804  | 0.1015171383  | 1.2606464324  |
| N    | 7.0    | -1.3104230453 | 0.0621049505  | -1.6668822425 |
| C    | 6.0    | -1.8608926640 | 1.1629562014  | -2.2918932407 |
| C    | 6.0    | -1.8583495886 | -1.0668515078 | -2.2437352294 |
| C    | 6.0    | 1.7938920565  | 1.2281530926  | 1.8368903019  |
| C    | 6.0    | 1.7680405738  | -0.9985345280 | 1.9051624930  |
| C    | 6.0    | -0.7642596941 | 2.8196651476  | -1.1005372598 |
| C    | 6.0    | 0.7306021328  | 2.8434428010  | 0.5563582531  |
| C    | 6.0    | -0.7811654744 | -2.6817404242 | -0.9725102674 |
| C    | 6.0    | 0.6845435243  | -2.6568817604 | 0.7060404151  |
| N    | 7.0    | -1.6097820912 | 2.4365873704  | -2.0410856876 |
| N    | 7.0    | 1.5693342474  | 2.4904473091  | 1.5156963670  |
| N    | 7.0    | -1.6173205856 | -2.3291379591 | -1.9333272260 |
| N    | 7.0    | 1.5165125524  | -2.2724657455 | 1.6591525042  |
| C    | 6.0    | 0.4860964848  | 4.2291721933  | 0.2002650000  |
| C    | 6.0    | -0.4570751579 | 4.2145749586  | -0.8405464540 |
| C    | 6.0    | 2.7056826931  | 0.8386883882  | 2.9005025054  |
| C    | 6.0    | 2.6883788098  | -0.5647783194 | 2.9444550062  |
| C    | 6.0    | 0.3939487743  | -4.0553185551 | 0.4332119746  |



|   |     |               |               |               |
|---|-----|---------------|---------------|---------------|
| C | 6.0 | -0.5302244725 | -4.0705800572 | -0.6239916819 |
| C | 6.0 | -2.7914163466 | -0.6771449515 | -3.2872063538 |
| C | 6.0 | -2.7928160117 | 0.7277374554  | -3.3174604531 |
| C | 6.0 | 1.0047219120  | 5.4298259130  | 0.6941004205  |
| C | 6.0 | -0.9137219943 | 5.4002273011  | -1.4233299666 |
| C | 6.0 | 0.5498579421  | 6.6130273668  | 0.1139821743  |
| C | 6.0 | -0.3978350407 | 6.5983346412  | -0.9312930156 |
| C | 6.0 | 3.5017994455  | 1.5828291363  | 3.7746261084  |
| C | 6.0 | 3.4657381568  | -1.2720693486 | 3.8641136576  |
| C | 6.0 | 4.2626220350  | -0.5308944447 | 4.7373991716  |
| C | 6.0 | 4.2807361731  | 0.8782191295  | 4.6929173074  |
| C | 6.0 | 0.8504638508  | -5.2400469214 | 1.0156614820  |
| C | 6.0 | -1.0299603742 | -5.2711795516 | -1.1345646908 |
| C | 6.0 | -0.5755453170 | -6.4555337998 | -0.5541391169 |
| C | 6.0 | 0.3528380391  | -6.4400798513 | 0.5070152028  |
| C | 6.0 | -3.5944727086 | 1.4343231840  | -4.2176605497 |
| C | 6.0 | -3.5936409441 | -1.4221632807 | -4.1563114142 |
| C | 6.0 | -4.3952265474 | 0.6920635483  | -5.0852390811 |
| C | 6.0 | -4.3949485740 | -0.7182779486 | -5.0545622241 |
| H | 1.0 | -3.5914547835 | 2.5195775993  | -4.2374337675 |
| H | 1.0 | -5.0312146051 | 1.2071642273  | -5.7995442607 |
| H | 1.0 | -5.0316565974 | -1.2639768510 | -5.7451363287 |
| H | 1.0 | -3.5902398500 | -2.5072595561 | -4.1293989251 |
| H | 1.0 | -1.6418570108 | 5.3842464328  | -2.2280690676 |
| H | 1.0 | -0.7291113796 | 7.5403321920  | -1.3592212488 |
| H | 1.0 | 0.9305774331  | 7.5659582848  | 0.4705974672  |
| H | 1.0 | 1.7344008286  | 5.4360305922  | 1.4975828267  |
| H | 1.0 | 3.5121144261  | 2.6675946551  | 3.7370616447  |
| H | 1.0 | 4.9132268799  | 1.4230924879  | 5.3880272884  |
| H | 1.0 | 4.8806523775  | -1.0468798815 | 5.4667380236  |
| H | 1.0 | 3.4485501790  | -2.3569529003 | 3.8949168996  |
| H | 1.0 | 1.5641297967  | -5.2237139208 | 1.8333354986  |
| H | 1.0 | 0.6844603476  | -7.3819325633 | 0.9350675128  |
| H | 1.0 | -0.9425110374 | -7.4089151066 | -0.9237870879 |
| H | 1.0 | -1.7454565722 | -5.2782731149 | -1.9507741976 |
| O | 8.0 | 1.3247356960  | 0.0009963539  | -1.2985762218 |
| O | 8.0 | -1.3320004833 | -0.0201623304 | 0.9624073443  |
| C | 6.0 | 1.5366337537  | 0.7035514266  | -2.5036120435 |
| H | 1.0 | 2.4945105438  | 0.3755052181  | -2.9230325073 |
| H | 1.0 | 0.7545462363  | 0.5024644003  | -3.2497960932 |
| H | 1.0 | 1.5908713909  | 1.7915639740  | -2.3501446216 |
| C | 6.0 | -2.3429655100 | 0.8324489675  | 1.2794720739  |
| C | 6.0 | -3.6241460529 | 0.6338718621  | 0.7371457210  |
| C | 6.0 | -2.1518585930 | 1.8633445179  | 2.2151842763  |
| C | 6.0 | -4.6851187781 | 1.4611778772  | 1.1118371289  |
| C | 6.0 | -3.2173009209 | 2.6876893370  | 2.5827519360  |
| C | 6.0 | -4.4883950476 | 2.4950735251  | 2.0323810728  |

|   |     |               |               |              |
|---|-----|---------------|---------------|--------------|
| H | 1.0 | -3.7782652649 | -0.1802218557 | 0.0347556137 |
| H | 1.0 | -5.6705121021 | 1.2932866603  | 0.6832990397 |
| H | 1.0 | -5.3158147558 | 3.1374433395  | 2.3217482922 |
| H | 1.0 | -3.0520167820 | 3.4817611930  | 3.3072556096 |
| H | 1.0 | -1.1686918845 | 2.0009537602  | 2.6553216787 |

6. SiPc<sup>-</sup>(OPh)(OMe): isolated anion radical species; no H<sub>2</sub>O molecule

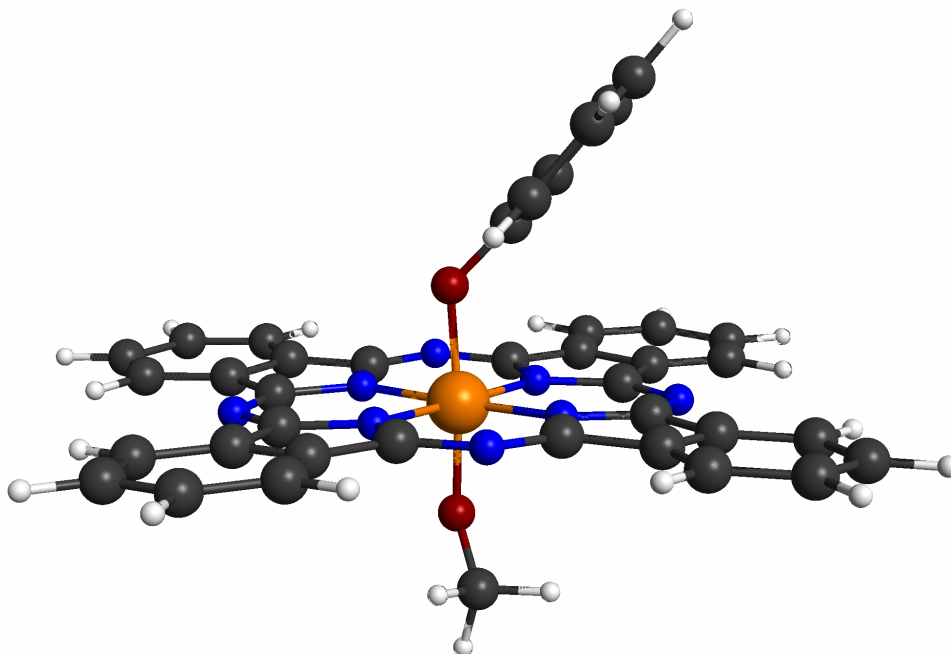

$E = -2377.59896 \text{ hartree}$

| ATOM | CHARGE | X             | Y             | Z             |
|------|--------|---------------|---------------|---------------|
| SI   | 14.0   | 0.0221198490  | 0.0618530711  | -0.1889161610 |
| N    | 7.0    | 0.0129054398  | 1.9942882004  | -0.2157167717 |
| N    | 7.0    | -0.0075742516 | -1.8671437556 | -0.1266006051 |
| N    | 7.0    | 1.2667773771  | 0.0957224058  | 1.3136322825  |
| N    | 7.0    | -1.2569906628 | 0.0386154803  | -1.6574603852 |
| C    | 6.0    | -1.7438961293 | 1.1396878926  | -2.3353263453 |
| C    | 6.0    | -1.8395399585 | -1.0859381415 | -2.2092827115 |
| C    | 6.0    | 1.7686547534  | 1.2223134116  | 1.9377761389  |
| C    | 6.0    | 1.8166619556  | -1.0090872244 | 1.9355899558  |
| C    | 6.0    | -0.6597420292 | 2.7985933527  | -1.1336989097 |
| C    | 6.0    | 0.7266165716  | 2.8345976561  | 0.6355762603  |
| C    | 6.0    | -0.7891950004 | -2.6989102599 | -0.9167304872 |
| C    | 6.0    | 0.7390418247  | -2.6692812950 | 0.7267524227  |
| N    | 7.0    | -1.4523595888 | 2.4299630816  | -2.1055296457 |
| N    | 7.0    | 1.5152454161  | 2.5048859140  | 1.6255645543  |
| N    | 7.0    | -1.6313435561 | -2.3660488904 | -1.8616977208 |
| N    | 7.0    | 1.5802979626  | -2.3017295529 | 1.6592915417  |
| C    | 6.0    | 0.4943616847  | 4.2233376429  | 0.2514301251  |
| C    | 6.0    | -0.3634749090 | 4.2003793031  | -0.8561070747 |
| C    | 6.0    | 2.6630422920  | 0.8333235051  | 2.9902647307  |
| C    | 6.0    | 2.6956765553  | -0.5825398617 | 2.9865640261  |
| C    | 6.0    | 0.4302116805  | -4.0729340182 | 0.4634482378  |

|   |     |               |               |               |
|---|-----|---------------|---------------|---------------|
| C | 6.0 | -0.5301221290 | -4.0911344866 | -0.5567324998 |
| C | 6.0 | -2.7256506887 | -0.6983239701 | -3.2704255983 |
| C | 6.0 | -2.6610887955 | 0.7137411813  | -3.3529637762 |
| C | 6.0 | 0.9712320710  | 5.4276803925  | 0.7736100454  |
| C | 6.0 | -0.7759457093 | 5.3816567623  | -1.4768108996 |
| C | 6.0 | 0.5615974829  | 6.6106837815  | 0.1555392069  |
| C | 6.0 | -0.3023507109 | 6.5878403099  | -0.9571547206 |
| C | 6.0 | 3.4341511905  | 1.5685265647  | 3.9076886066  |
| C | 6.0 | 3.4942062972  | -1.2868334334 | 3.9043161454  |
| C | 6.0 | 4.2531846495  | -0.5534695276 | 4.8066298028  |
| C | 6.0 | 4.2238620564  | 0.8653649847  | 4.8076373193  |
| C | 6.0 | 0.9002321818  | -5.2562089288 | 1.0364108029  |
| C | 6.0 | -1.0524114092 | -5.2931276635 | -1.0380018262 |
| C | 6.0 | -0.5850923851 | -6.4792385852 | -0.4674253522 |
| C | 6.0 | 0.3808722338  | -6.4609759571 | 0.5573791977  |
| C | 6.0 | -3.4263260293 | 1.4153511113  | -4.3005315869 |
| C | 6.0 | -3.5526423854 | -1.4329967109 | -4.1376835007 |
| C | 6.0 | -4.2433065361 | 0.6826711278  | -5.1515521403 |
| C | 6.0 | -4.3063433898 | -0.7325648650 | -5.0703855170 |
| H | 1.0 | -3.3762930172 | 2.4988599156  | -4.3606277839 |
| H | 1.0 | -4.8462468848 | 1.1980299298  | -5.8948750928 |
| H | 1.0 | -4.9567635013 | -1.2738622847 | -5.7527386515 |
| H | 1.0 | -3.5991798824 | -2.5164337622 | -4.0735784019 |
| H | 1.0 | -1.4404294388 | 5.3581156526  | -2.3353390033 |
| H | 1.0 | -0.6026669483 | 7.5256432269  | -1.4169977640 |
| H | 1.0 | 0.9140321884  | 7.5657276538  | 0.5360528593  |
| H | 1.0 | 1.6376853092  | 5.4388719911  | 1.6308584341  |
| H | 1.0 | 3.4100376136  | 2.6545921194  | 3.9070346221  |
| H | 1.0 | 4.8315786773  | 1.4069297547  | 5.5281090266  |
| H | 1.0 | 4.8816462447  | -1.0706726061 | 5.5271831095  |
| H | 1.0 | 3.5151629440  | -2.3729538206 | 3.9009695985  |
| H | 1.0 | 1.6434448771  | -5.2359094557 | 1.8277970122  |
| H | 1.0 | 0.7247852720  | -7.4006428361 | 0.9815596916  |
| H | 1.0 | -0.9715558614 | -7.4326958906 | -0.8177478433 |
| H | 1.0 | -1.7976665178 | -5.3011376782 | -1.8276991374 |
| O | 8.0 | 1.3278615942  | -0.0564120158 | -1.3404235799 |
| O | 8.0 | -1.3249092313 | -0.0198875571 | 0.9842866448  |
| C | 6.0 | 2.4182792203  | 0.8237592478  | -1.4759944532 |
| H | 1.0 | 3.1102365990  | 0.4061340252  | -2.2192475560 |
| H | 1.0 | 2.1141457098  | 1.8221704876  | -1.8249743330 |
| H | 1.0 | 2.9754005461  | 0.9509561447  | -0.5355401617 |
| C | 6.0 | -2.3228864673 | 0.8451302792  | 1.2795417908  |
| C | 6.0 | -3.5950336293 | 0.6835481449  | 0.6993754564  |
| C | 6.0 | -2.1452952510 | 1.8559718933  | 2.2424856278  |
| C | 6.0 | -4.6546903039 | 1.5146455332  | 1.0692756041  |
| C | 6.0 | -3.2089289725 | 2.6846718605  | 2.6050370012  |
| C | 6.0 | -4.4699060160 | 2.5221133793  | 2.0216877029  |

|   |     |               |               |               |
|---|-----|---------------|---------------|---------------|
| H | 1.0 | -3.7395267472 | -0.1068560866 | -0.0315785916 |
| H | 1.0 | -5.6312536363 | 1.3715374503  | 0.6114095354  |
| H | 1.0 | -5.2967495999 | 3.1669584299  | 2.3081364993  |
| H | 1.0 | -3.0512571555 | 3.4600718072  | 3.3518257609  |
| H | 1.0 | -1.1688980255 | 1.9735155608  | 2.7030657486  |
